# Supplementary material
Source: PubMed Central journal article supplement (PMC4136725)
Supplement: jo501252p_si_001.pdf [file jo501252p_si_001.pdf]

# Toward hypoxia-selective DNA-alkylating agents built by grafting nitrogen mustards onto the bioreductively-activated, hypoxia-selective DNA-oxidizing agent 3-amino-1,2,4-benzotriazine 1,4-dioxide (tirapazamine)

Kevin M. Johnson<sup>‡</sup>, Zachary D. Parsons<sup>‡</sup>, Charles L. Barnes<sup>‡</sup> and Kent S. Gates<sup>‡,§,\*</sup>

<sup>‡</sup>Department of Chemistry, University of Missouri, Columbia, MO 65211

<sup>§</sup>Department of Biochemistry, University of Missouri, Columbia, MO 65211

\*E-mail: gatesk@missouri.edu, Phone: (573) 882-6763

## Table of Contents

|                                                                                                                                               |    |
|-----------------------------------------------------------------------------------------------------------------------------------------------|----|
| Figure S1. Crystal structure of <b>19</b> isolated from the reaction of tosyl chloride with <b>15</b> .....                                   | 2  |
| Table S1. Crystal and data collection parameters for crystal structure in Figure S1 .....                                                     | 3  |
| Figure S2. HPLC chromatograms showing the hydrolysis of compounds <b>17a</b> and <b>18a</b> .....                                             | 4  |
| Figure S3. pH-dependent changes in the absorbance spectra<br>and pH versus absorbance plot for <b>29</b> .....                                | 5  |
| Figure S4. pH versus absorbance plots for <b>31</b> and <b>32</b> .....                                                                       | 6  |
| Figure S5. pH-dependent changes in the absorbance spectra<br>and pH versus absorbance plot for <b>9</b> and <b>12</b> .....                   | 7  |
| Figure S6. HPLC chromatograms showing the in vitro metabolic conversion<br>of <b>15</b> to <b>16</b> by NADPH:cytochrome P450 reductase ..... | 8  |
| Figure S7. HPLC chromatograms showing the in vitro metabolic conversion<br>of <b>9</b> to <b>12</b> by NADPH:cytochrome P450 reductase .....  | 9  |
| <sup>1</sup> H-NMR and <sup>13</sup> C-NMR spectra.....                                                                                       | 10 |
| References.....                                                                                                                               | 50 |

Figure S1

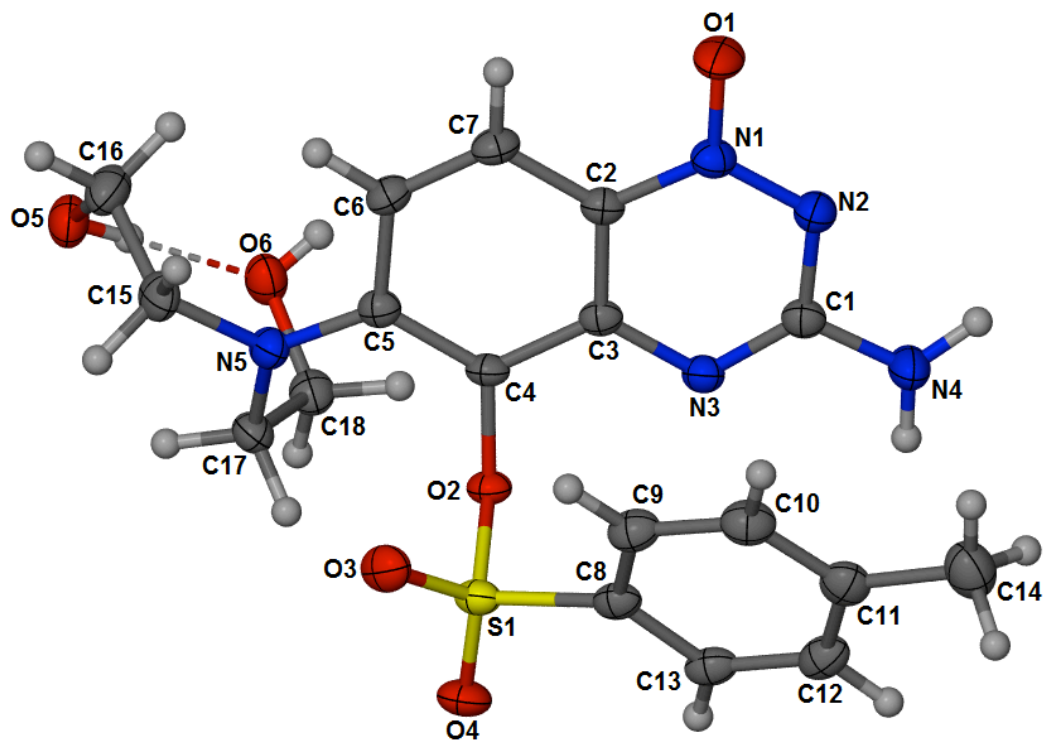

Figure S1. Crystal structure of **19** obtained from the reaction of tosyl chloride with **15**.

**Table S1**

|                                            |                                |
|--------------------------------------------|--------------------------------|
|                                            |                                |
| Empirical formula                          | C18 H21 N5 O6 S                |
| Formula weight                             | 435.46                         |
| Temperature, (K)                           | 173(2)                         |
| W. length, (Å)                             | 0.71073                        |
| Crystal system                             | Monoclinic                     |
| Space group                                | P 21/c                         |
| a, (Å)                                     | 11.8137(17)                    |
| b, (Å)                                     | 7.0470(10)                     |
| c, (Å)                                     | 24.199(4)                      |
| $\alpha$ , (deg)                           | 90                             |
| $\beta$ , (deg)                            | 101.033                        |
| $\gamma$ , (deg)                           | 90                             |
| Volume, (Å <sup>3</sup> )                  | 1977.4(5)                      |
| Z/calculated density (Mg/m <sup>3</sup> )  | 4/1.463                        |
| Absorption coefficient (mm <sup>-1</sup> ) | 0.211                          |
| Crystal size (mm)                          | 0.50 x 0.35 x 0.10             |
| Reflections collected/unique               | 22323 / 4574 [R(int) = 0.0261] |
| Data/restraints/parameters                 | 4574 / 0 / 276                 |
| GOF                                        | 1.047                          |
| R indices (all data)                       | R1 = 0.0413, wR2 = 0.0972      |

**Table S1.** Crystal and data collection parameters for the crystal structure of **19**.

**Figure S2**

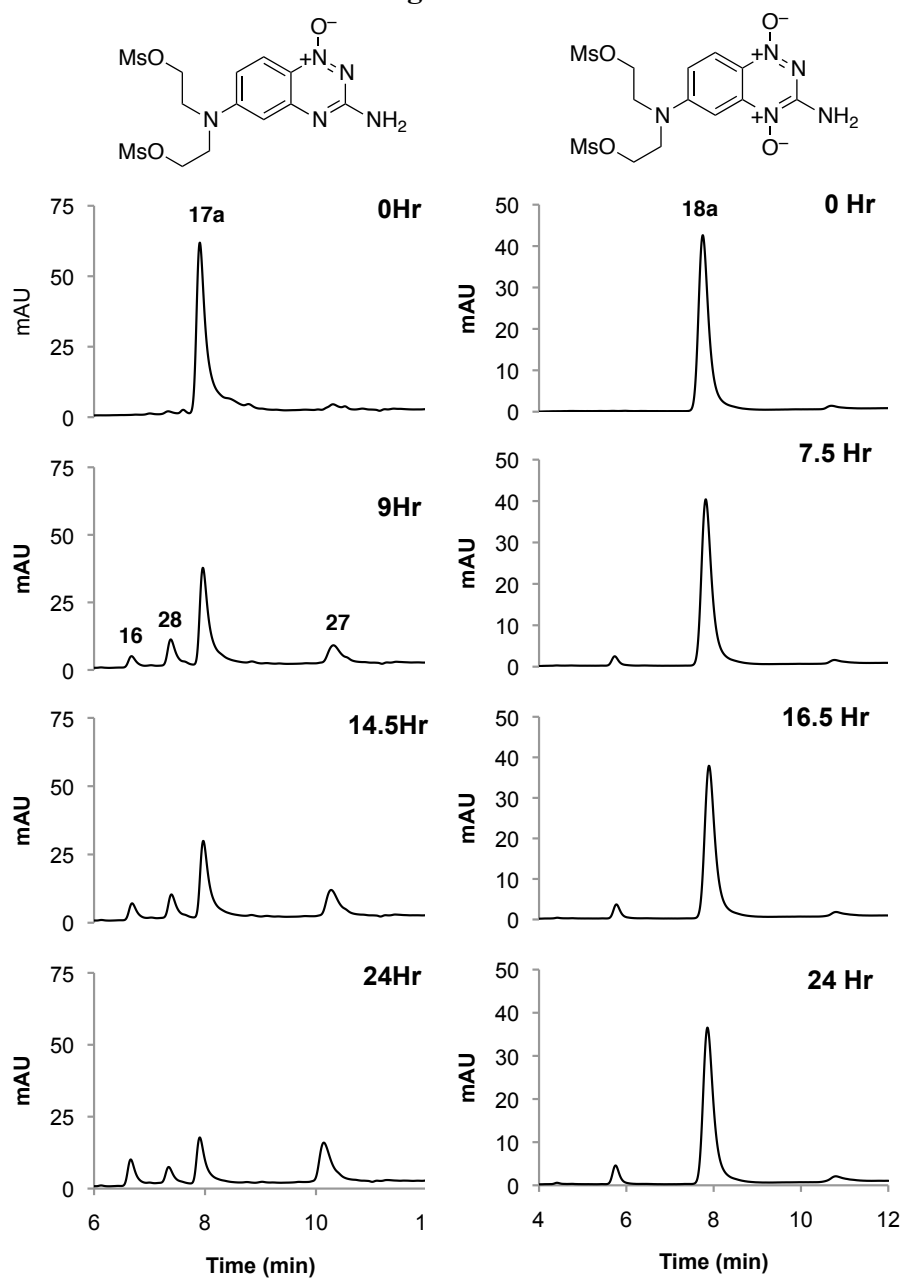

**Figure S2.** Representative HPLC chromatograms showing the hydrolysis of compounds **17a** (left) and **18a** (right) (250  $\mu$ M) in sodium phosphate buffer (25 mM, pH 7) containing DMF (2.5% v/v) at 50  $^{\circ}$ C. Compounds were detected by their absorbance at 280 nm. The disappearance of compound **17a** and appearance of hydrolysis products **16** and **27** over a 24 h time period is shown here (left). Detailed conditions are provided in the Experimental Section of the paper.

Figure S3

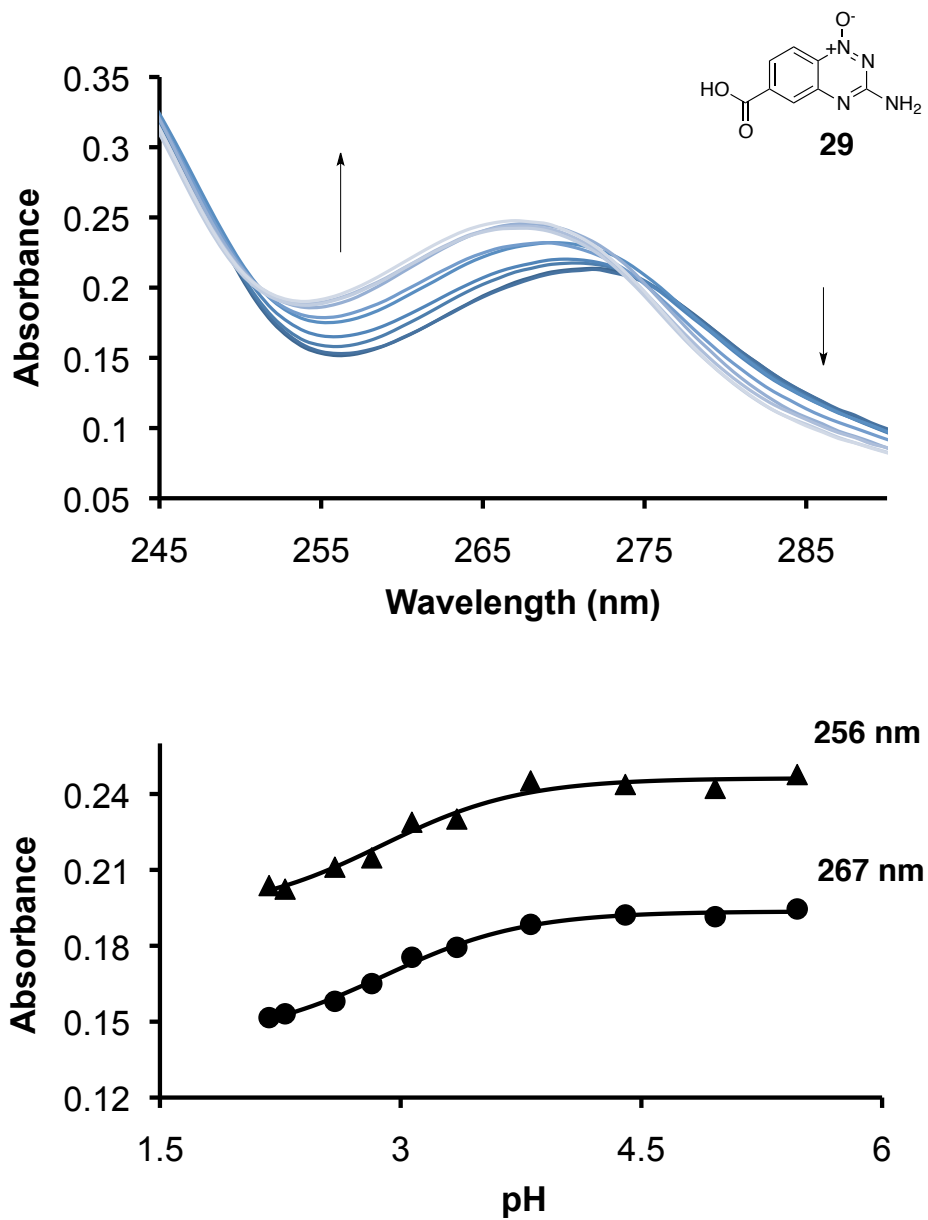

Figure S3.  $pK_a$  determination for **29**. Absorbance spectra (top) and titration curves (bottom) with least squares fitting for compound **29** from pH 2.18-5.47.

Figure S4

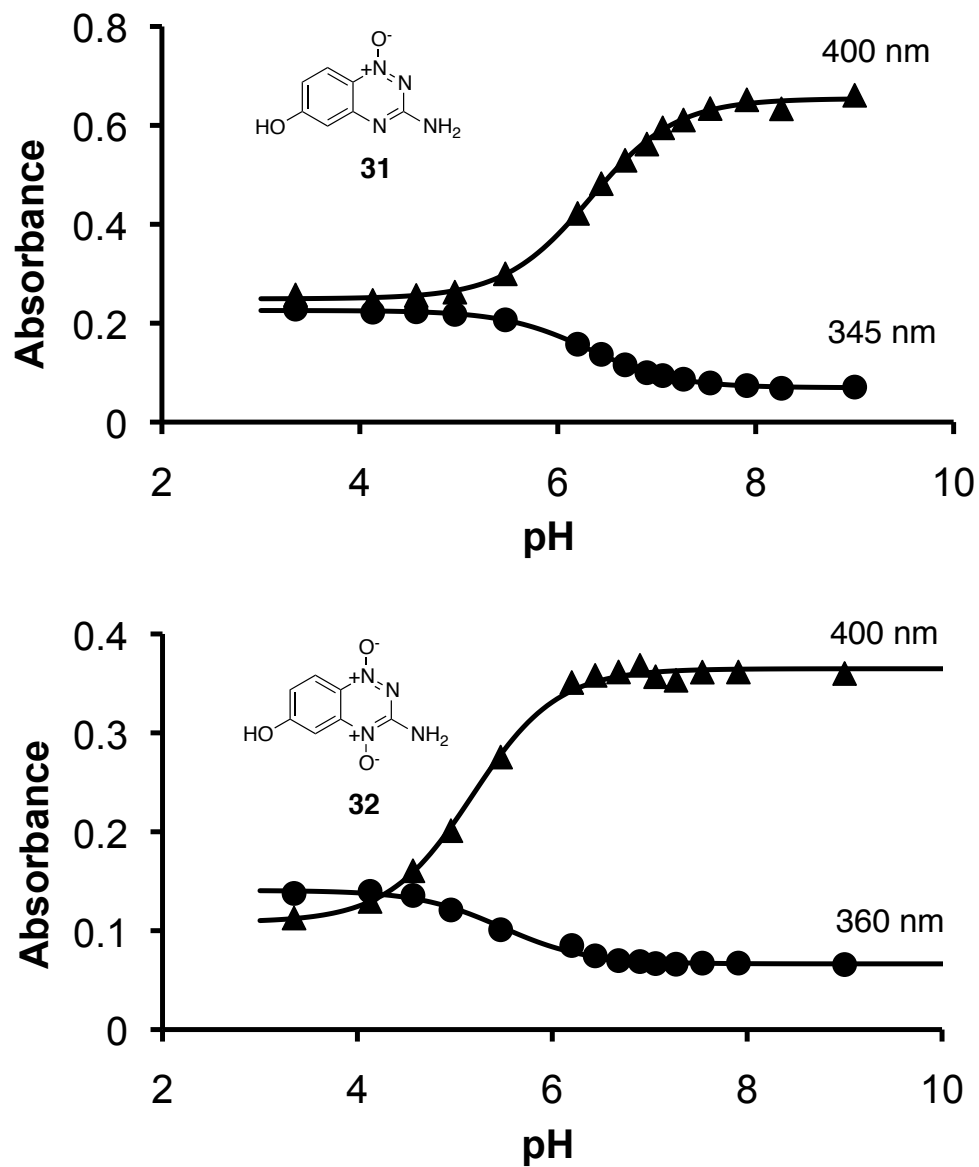

Figure S4.  $pK_a$  determination for compounds **31** and **32**. Titration curves with least squares fitting of compounds **31** (top) and **32** (bottom) from pH 3.35-9.00. The absorbance spectra of these compounds as a function of pH are shown in the manuscript.

Figure S5

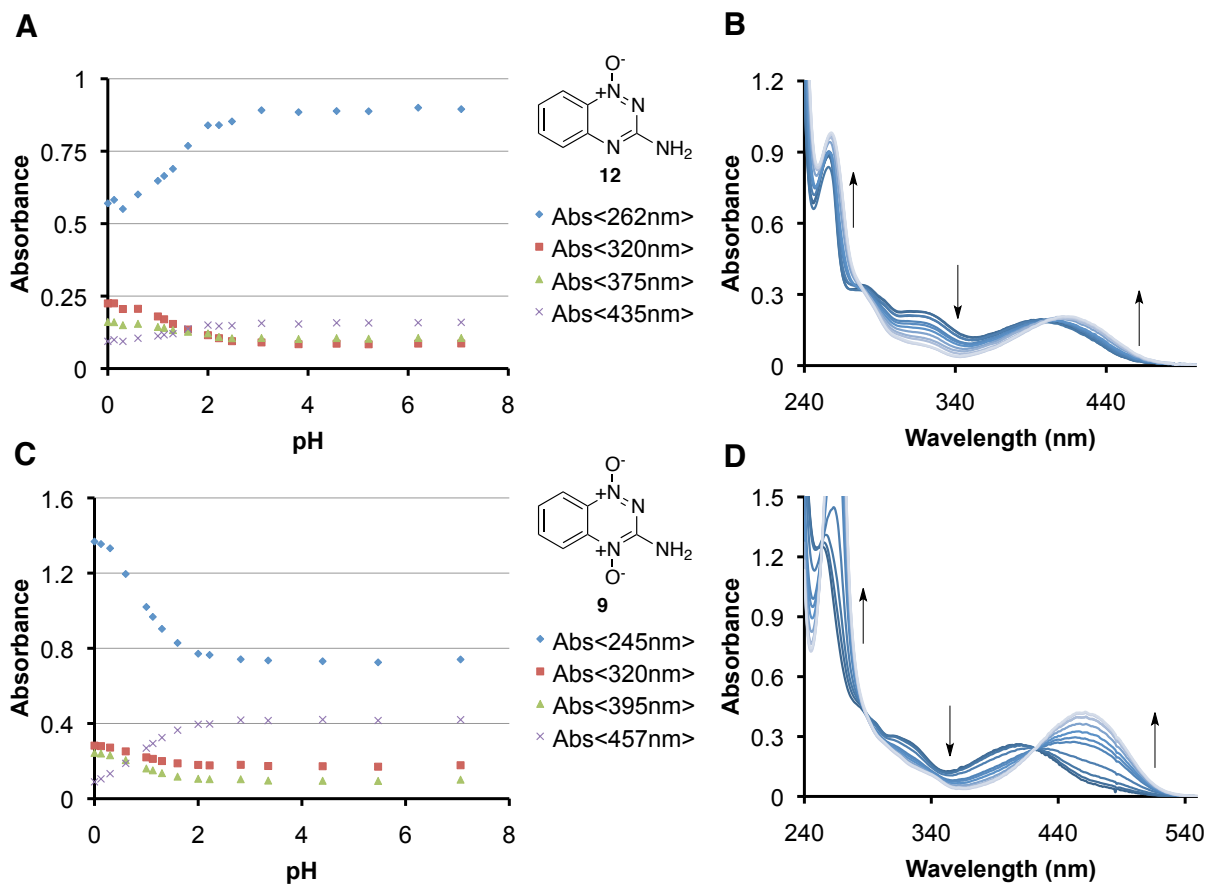

**Figure S5.** Control experiments showing the pH-dependent changes in the absorbance spectra of compounds **12** and **9**. There are not significant changes in the absorbance spectra for these molecules in the pH 3-7 region. This provides evidence that the pH-dependent changes in the absorbance spectra for **29**, **31**, and **32** in the pH 3-7 range are likely associated with protonation and deprotonation of the carboxylate and phenol groups of these analogs.

**Figure S6**

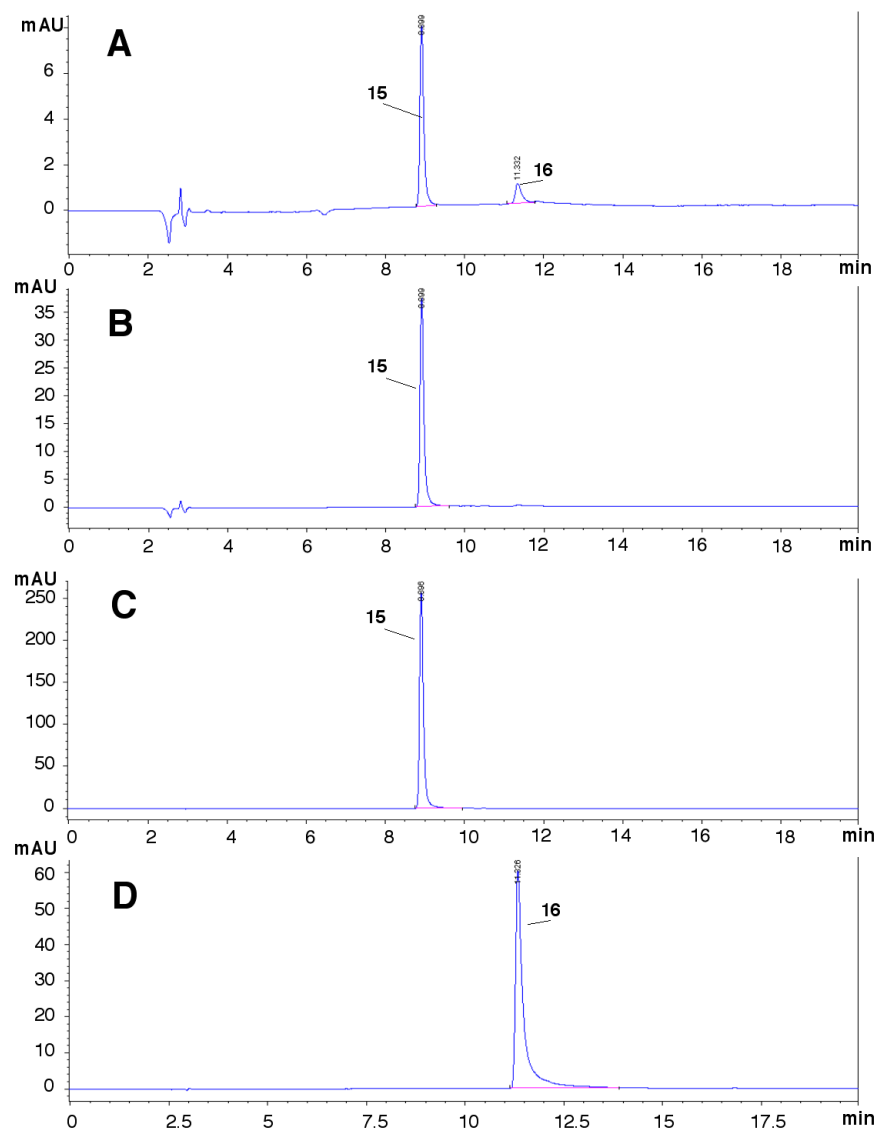

**Figure S6.** HPLC chromatograms showing the in vitro metabolic conversion of **15** to **16** by NADPH:cytochrome P450 reductase and associated controls: (A) reduction of **15** under anaerobic conditions, (B) same except under aerobic conditions, (C) authentic standard of **15**, and (D) authentic standard of **16**. Detailed conditions are provided in the Experimental Section of the paper.



**Figure S7**

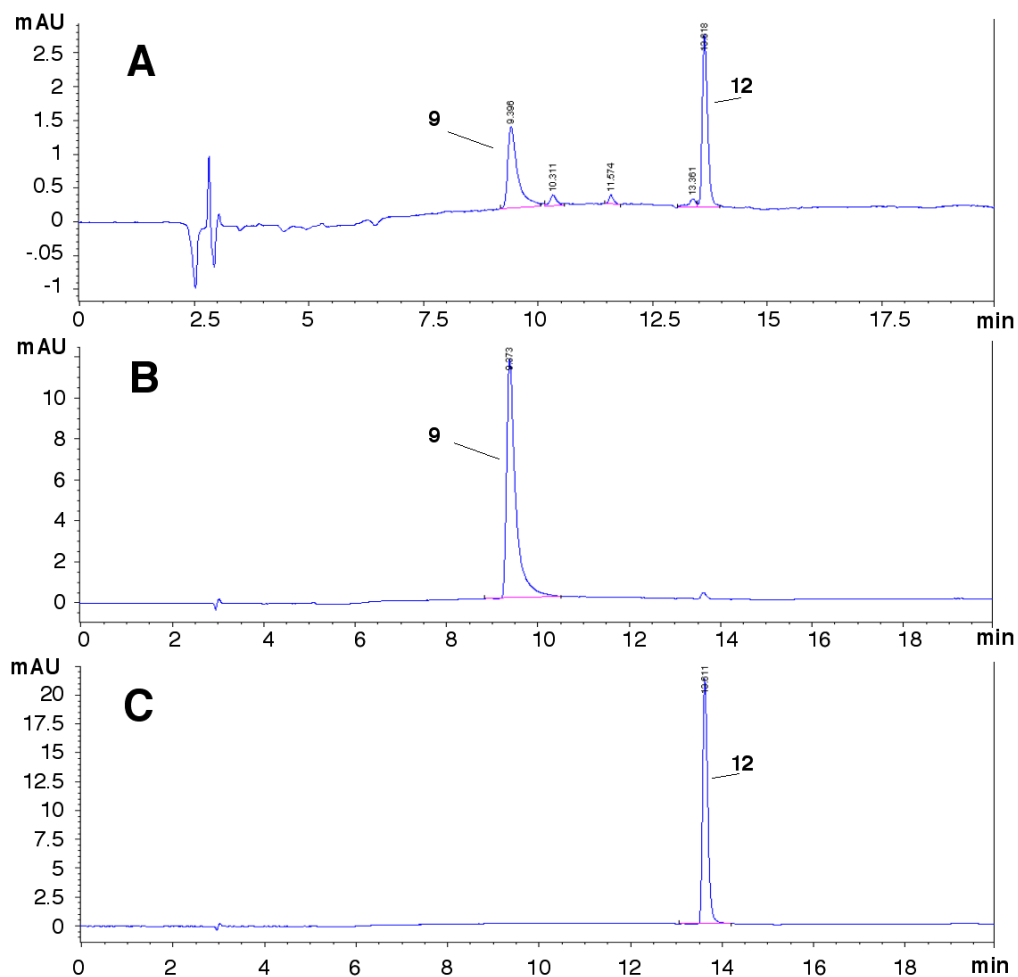

**Figure S7.** HPLC chromatograms showing the in vitro metabolic reduction of **9** to **12** by NADPH:cytochrome P450 reductase using the same conditions employed for the reduction of **15** to **16** (see: Experimental Section for details). Panel (A) Reduction of **9** under anaerobic conditions, (B) HPLC standard chromatogram of **9**, and (C) HPLC standard chromatogram of **12**.

# <sup>1</sup>H-NMR and <sup>13</sup>C-NMR Spectra

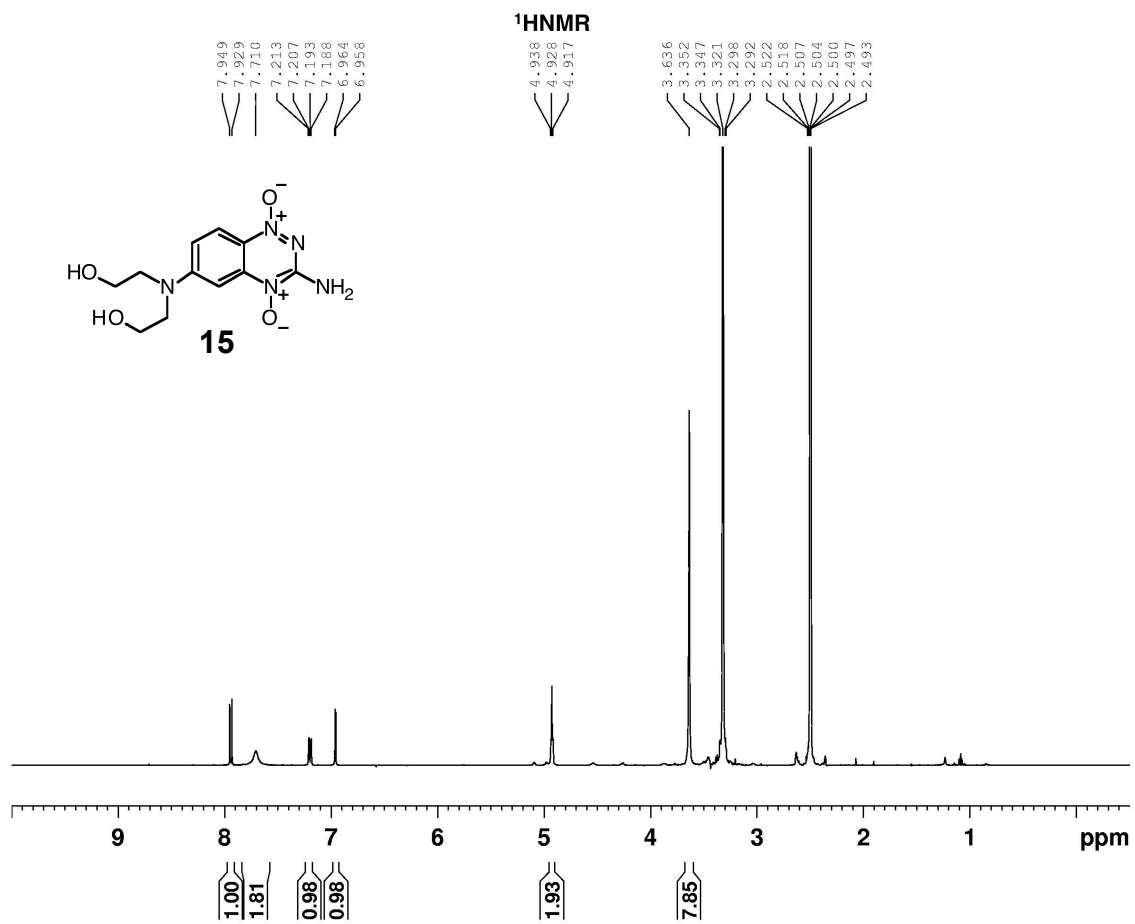

<sup>13</sup>CNMR

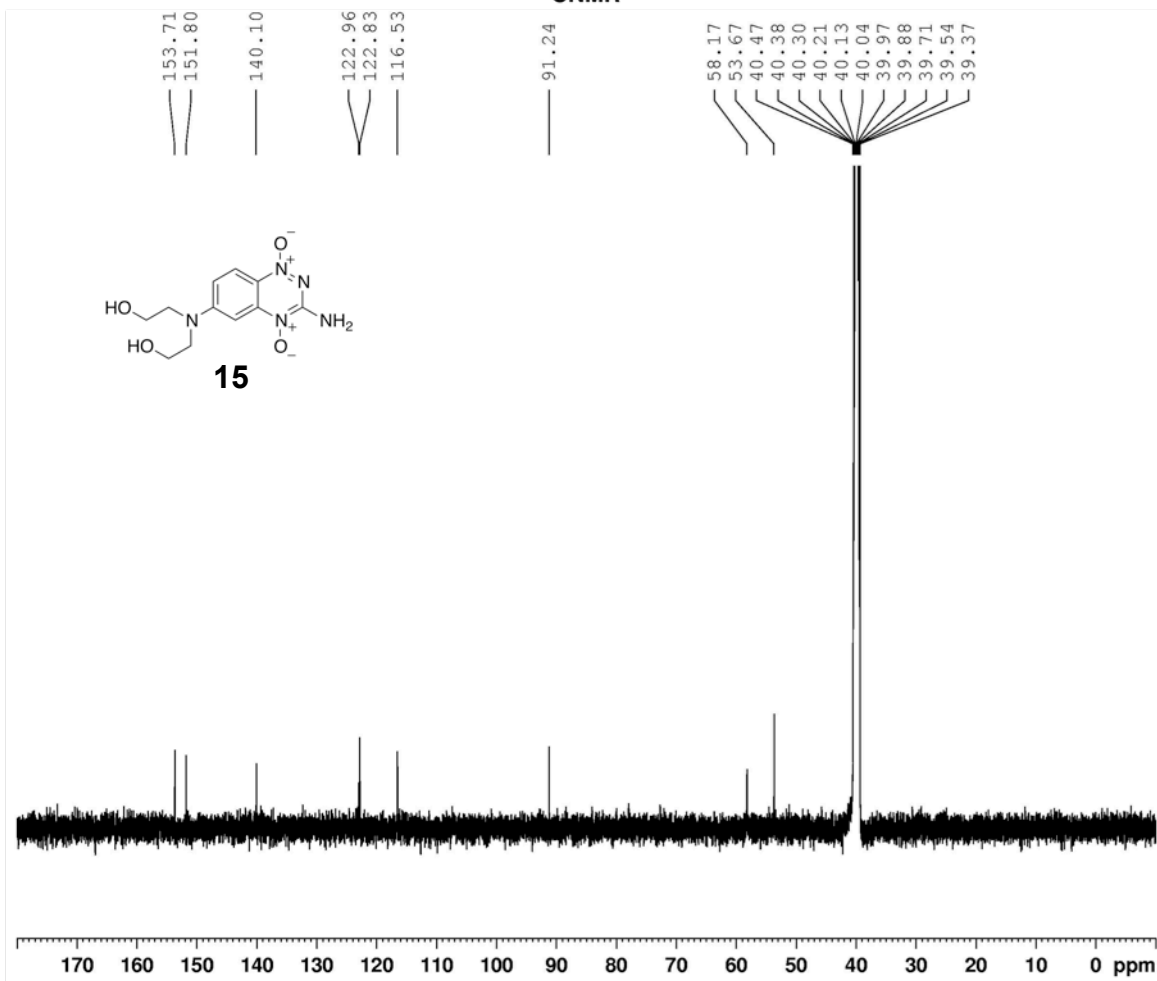

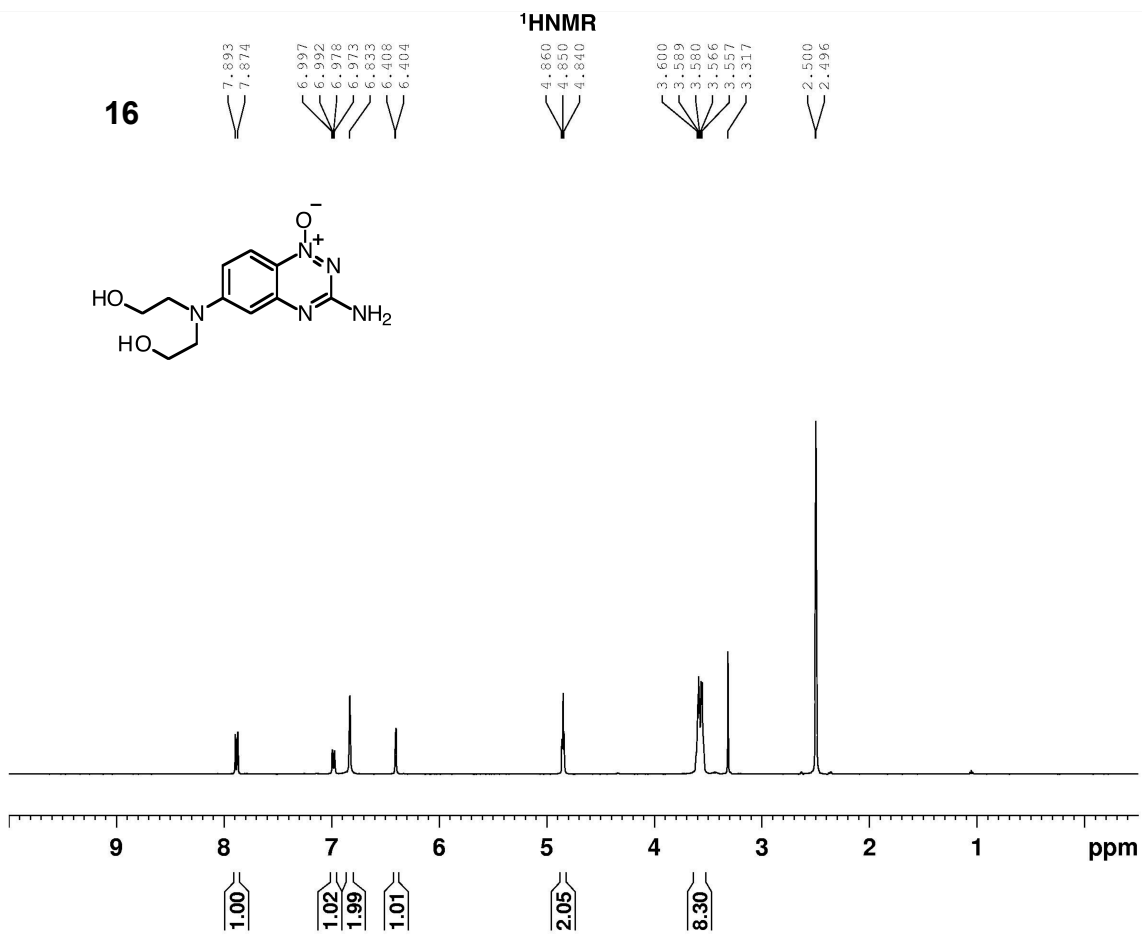

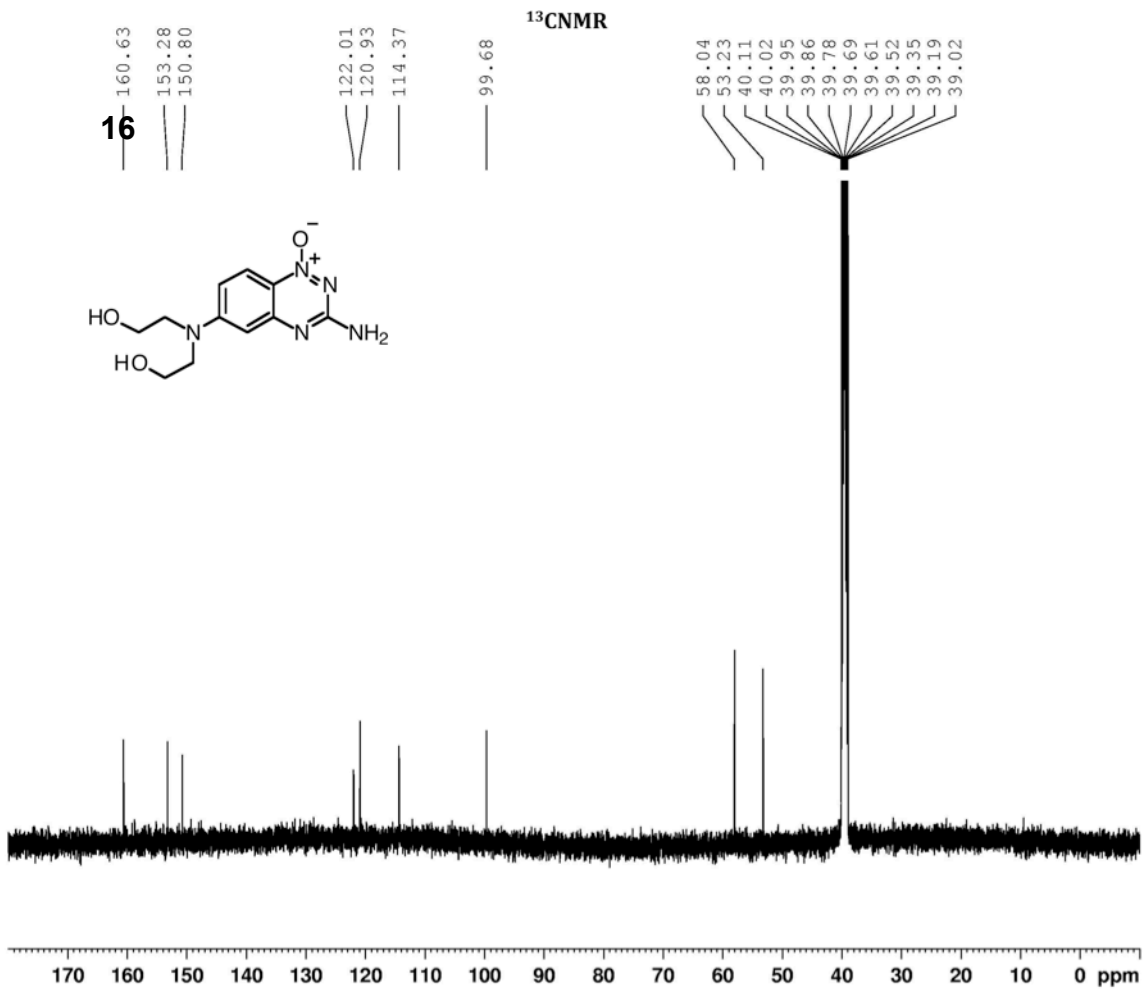

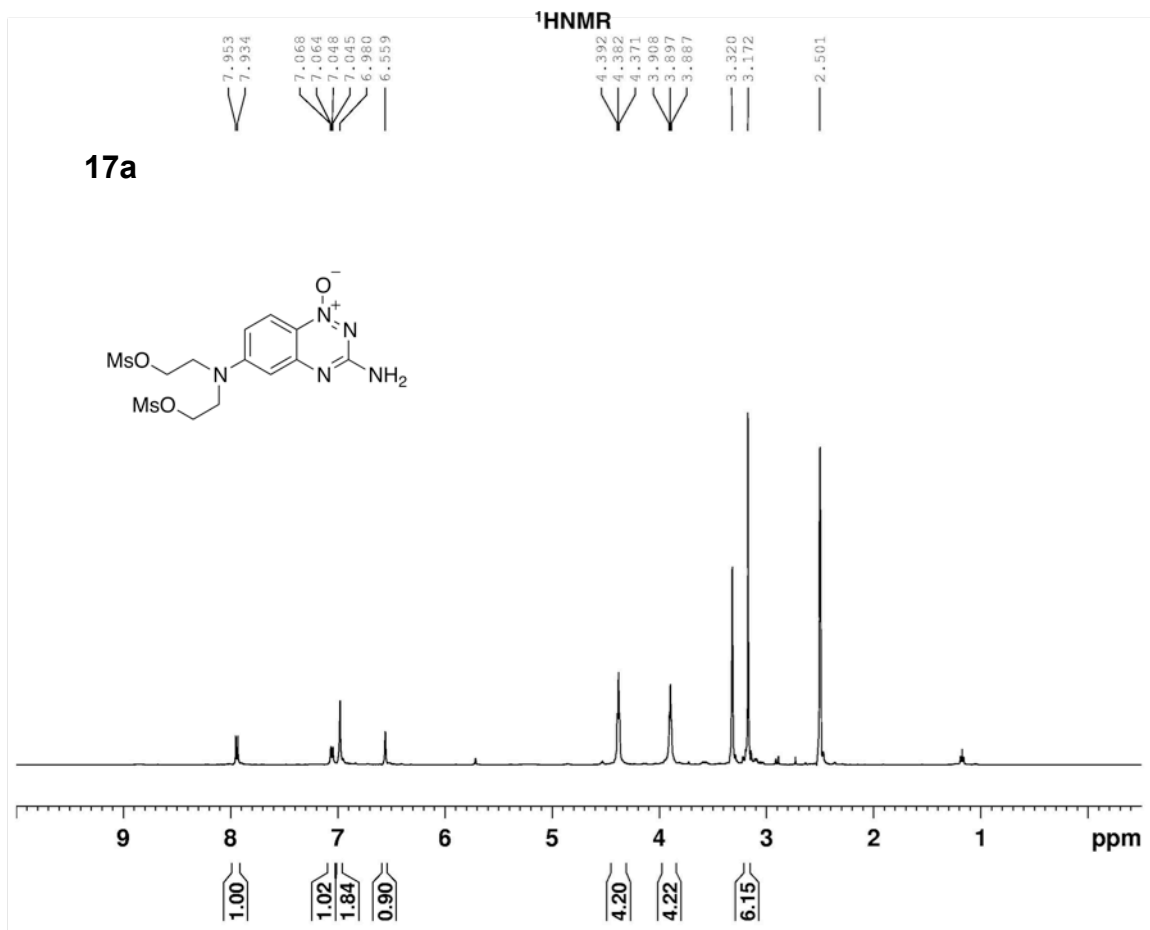

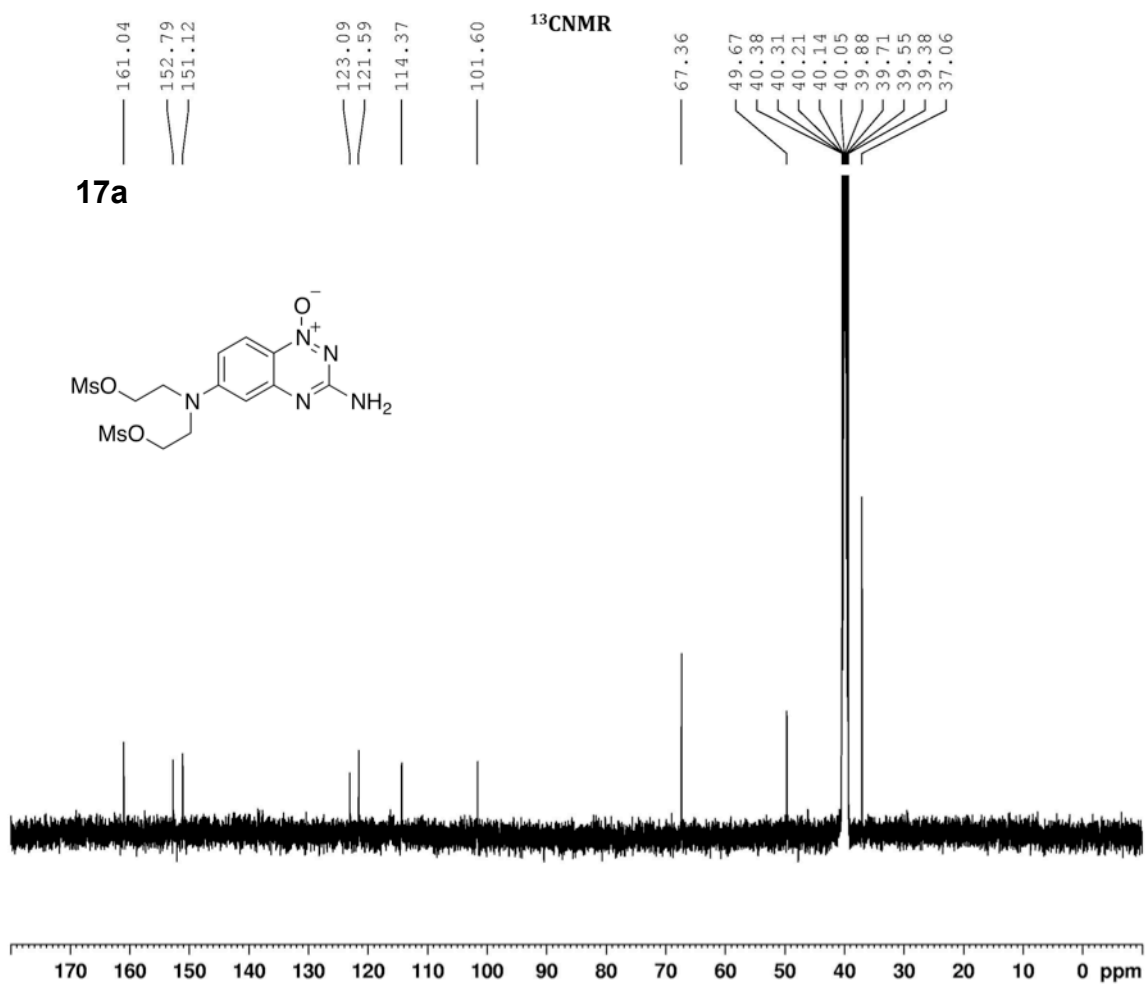

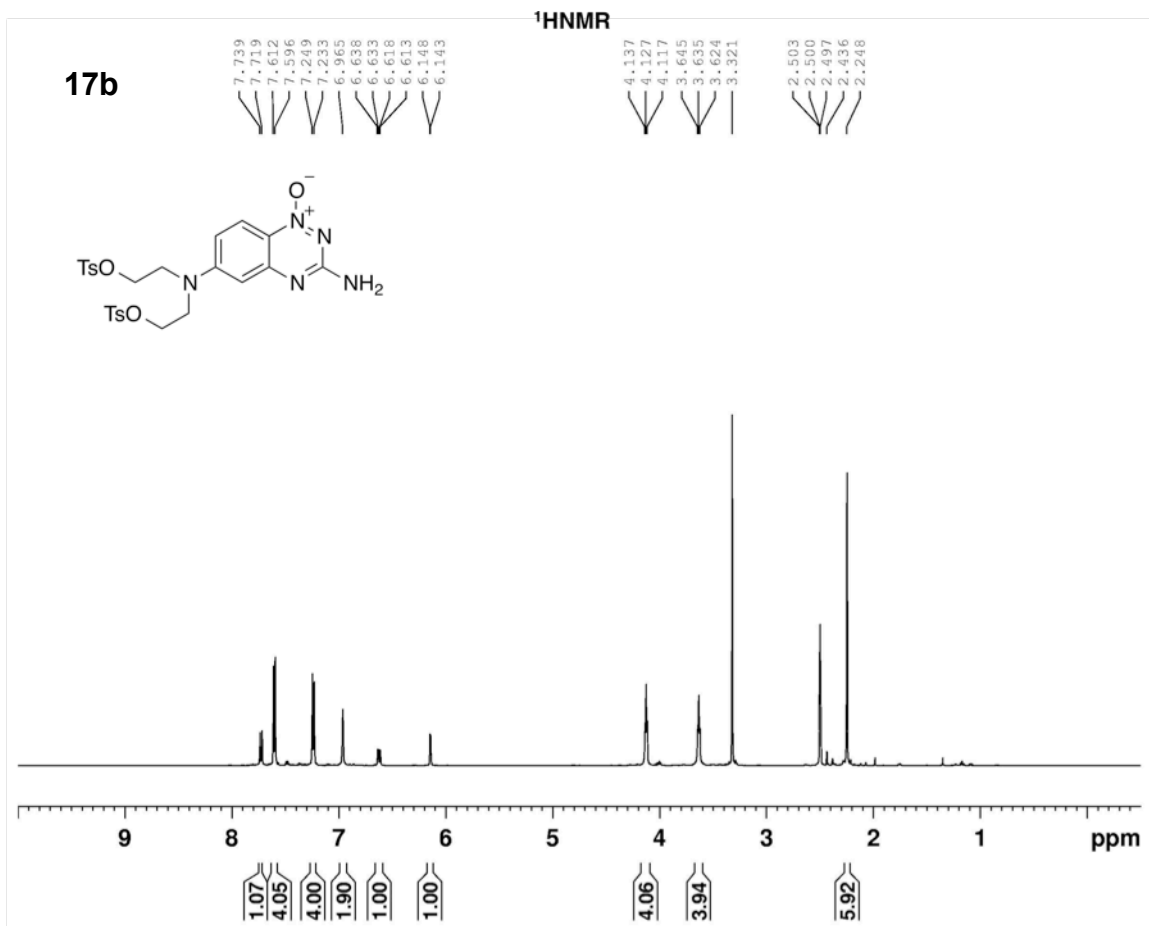



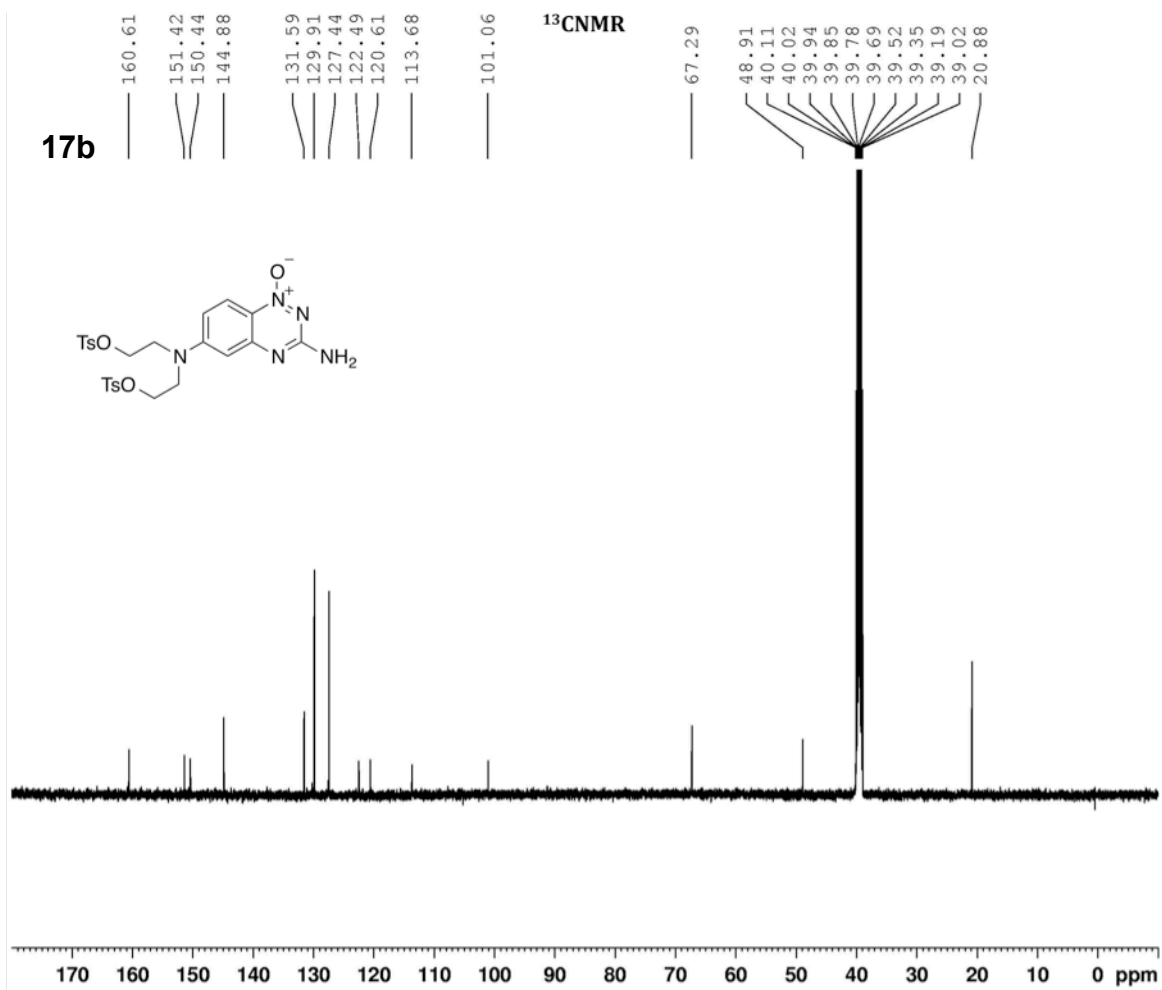

<sup>1</sup>HNMR

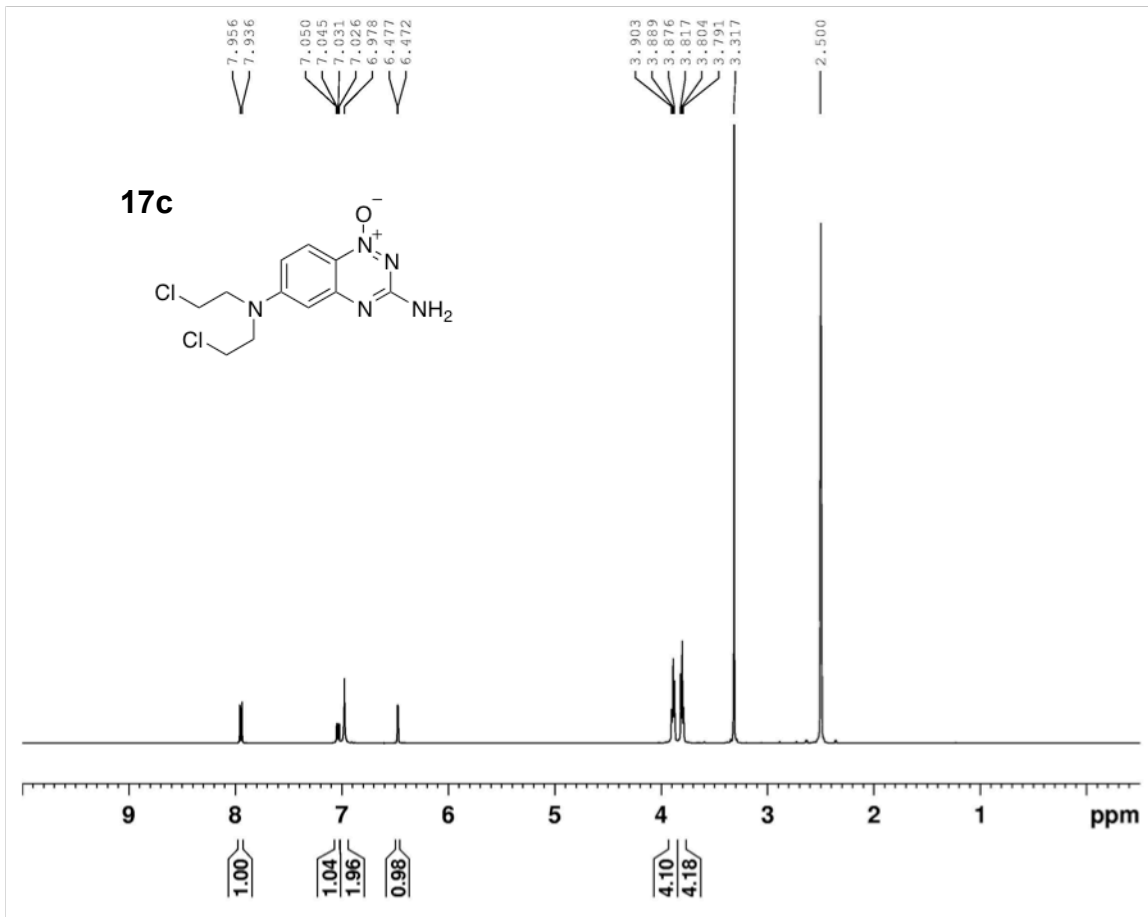

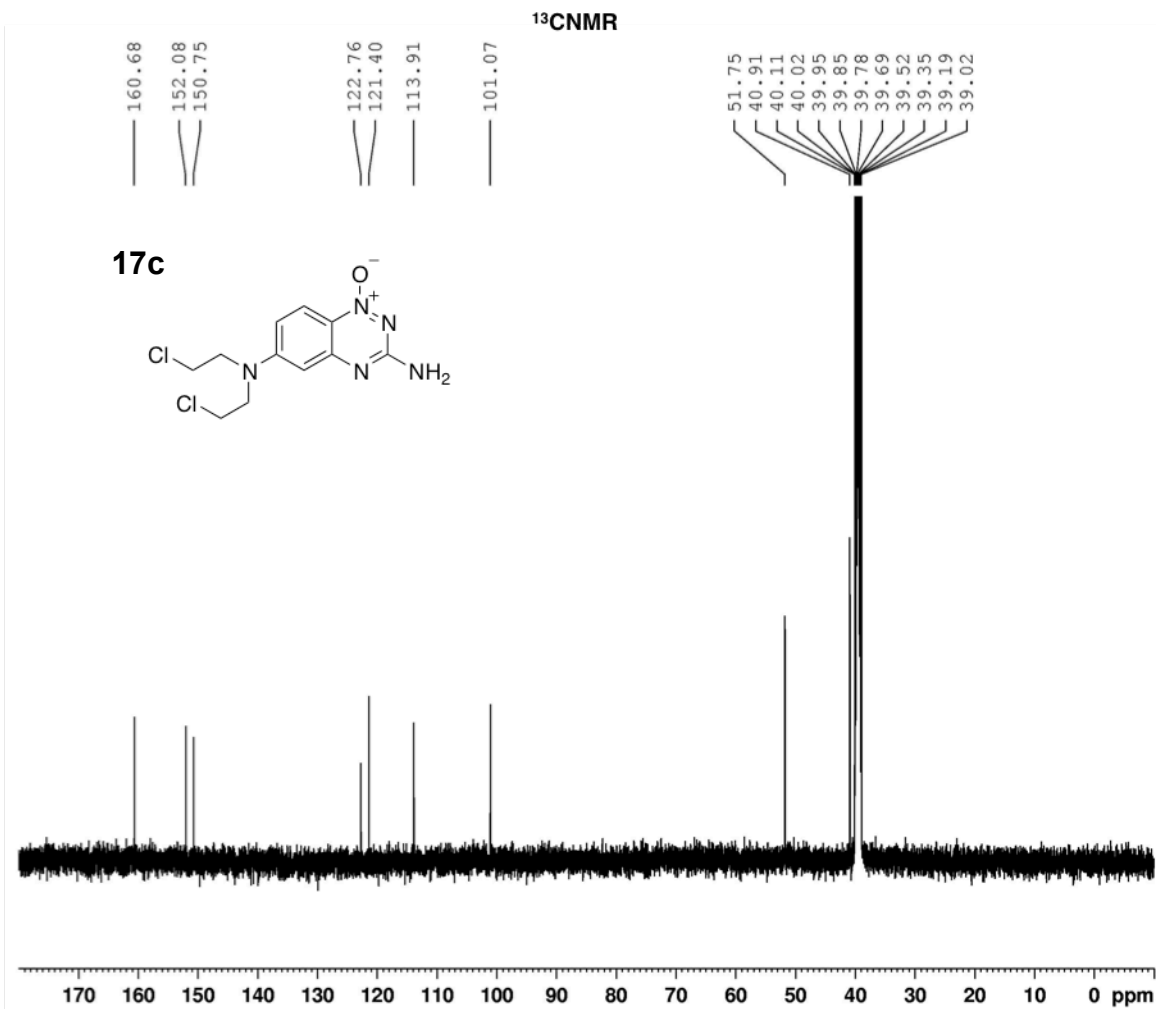

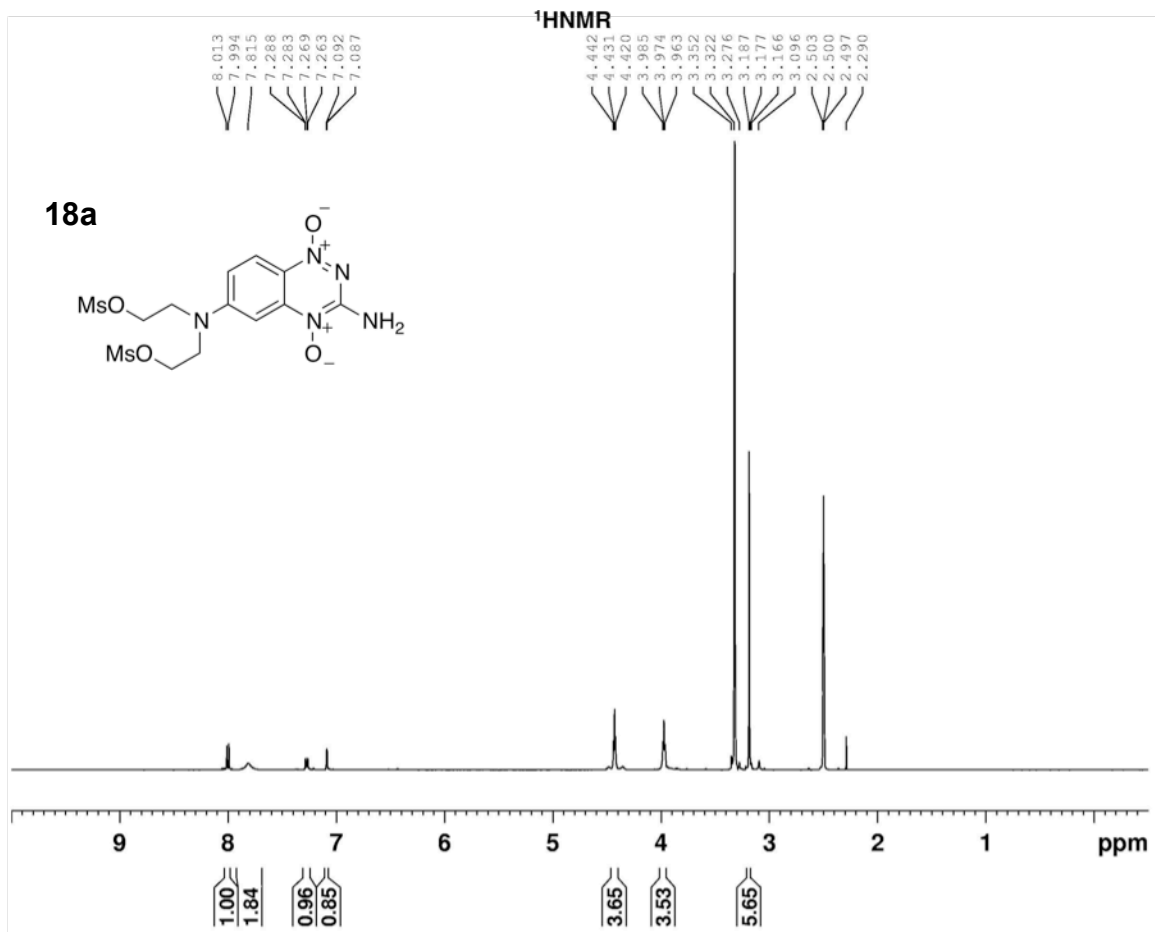

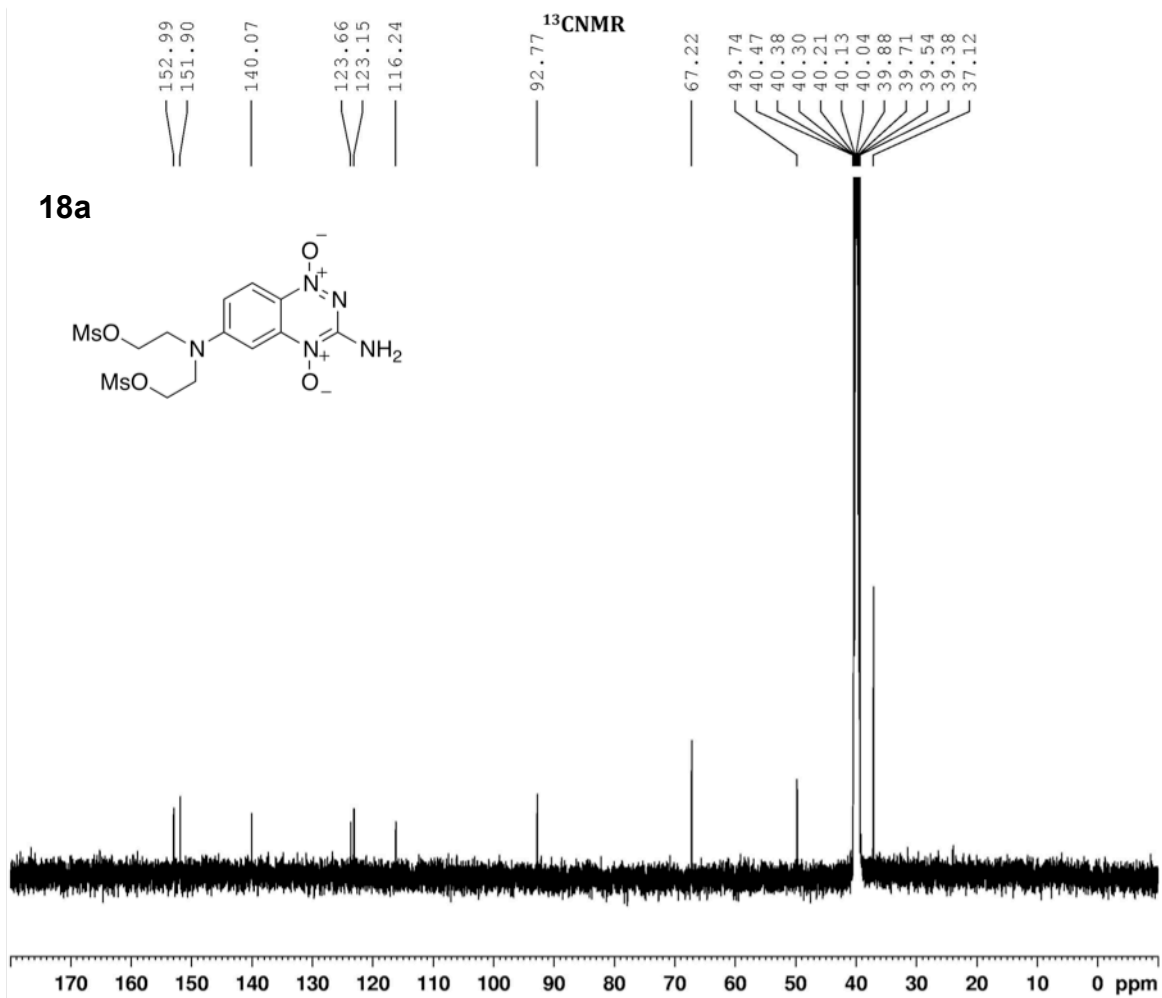

<sup>1</sup>HNMR

18b

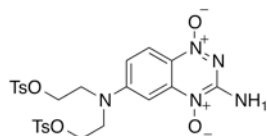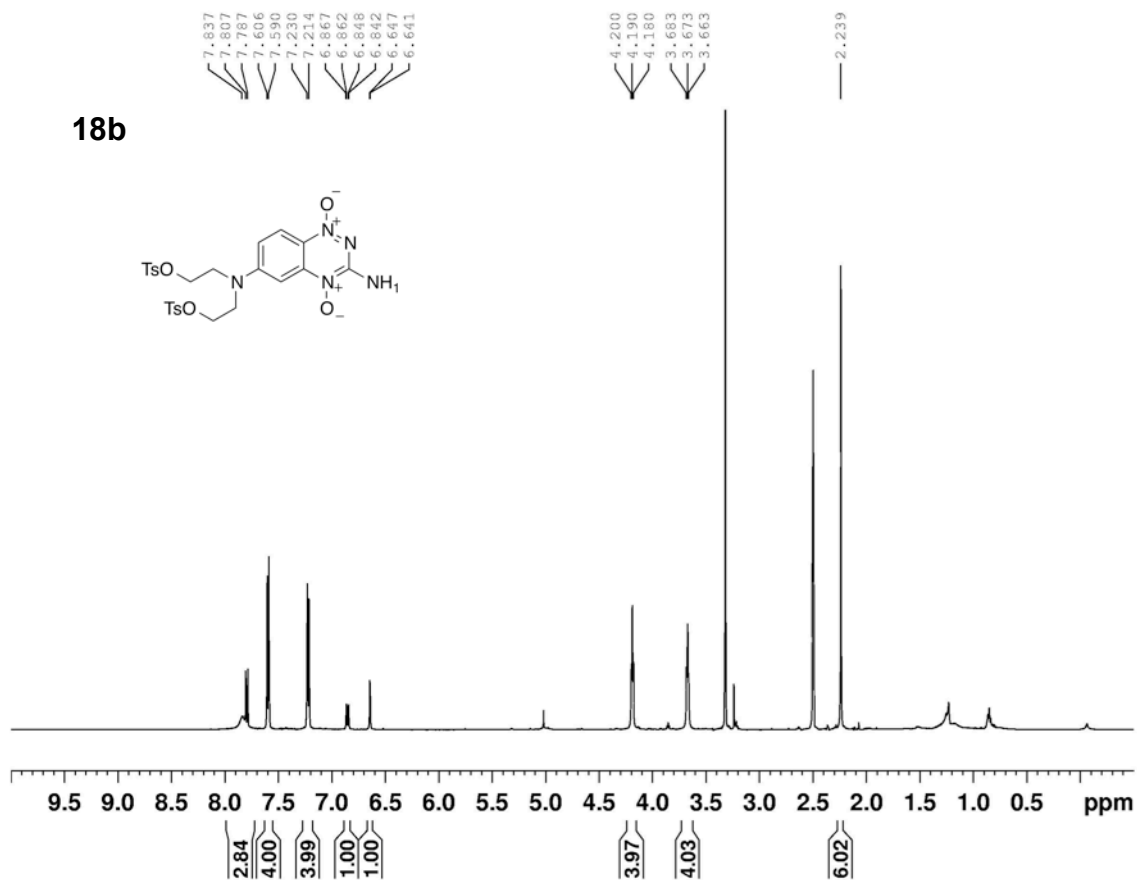

<sup>13</sup>CNMR

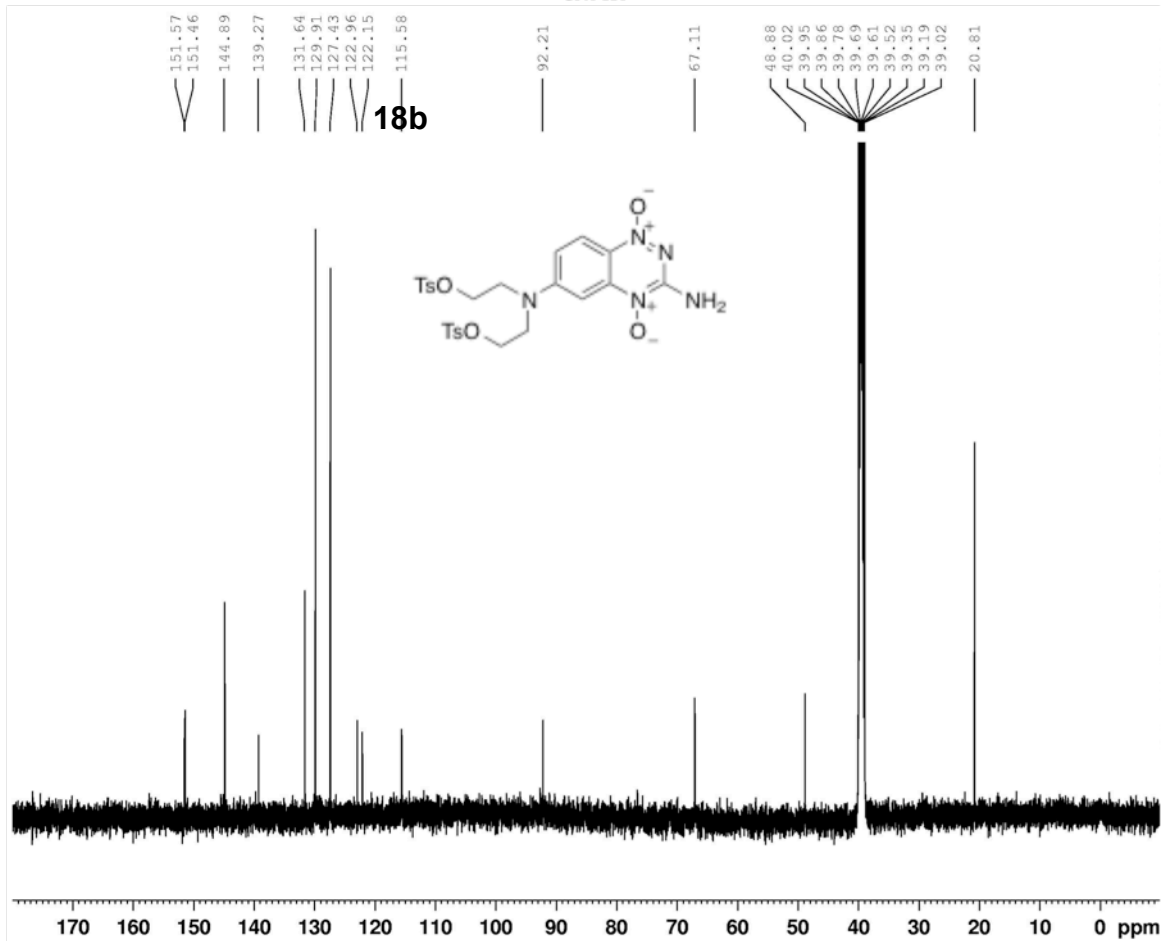

<sup>1</sup>H NMR

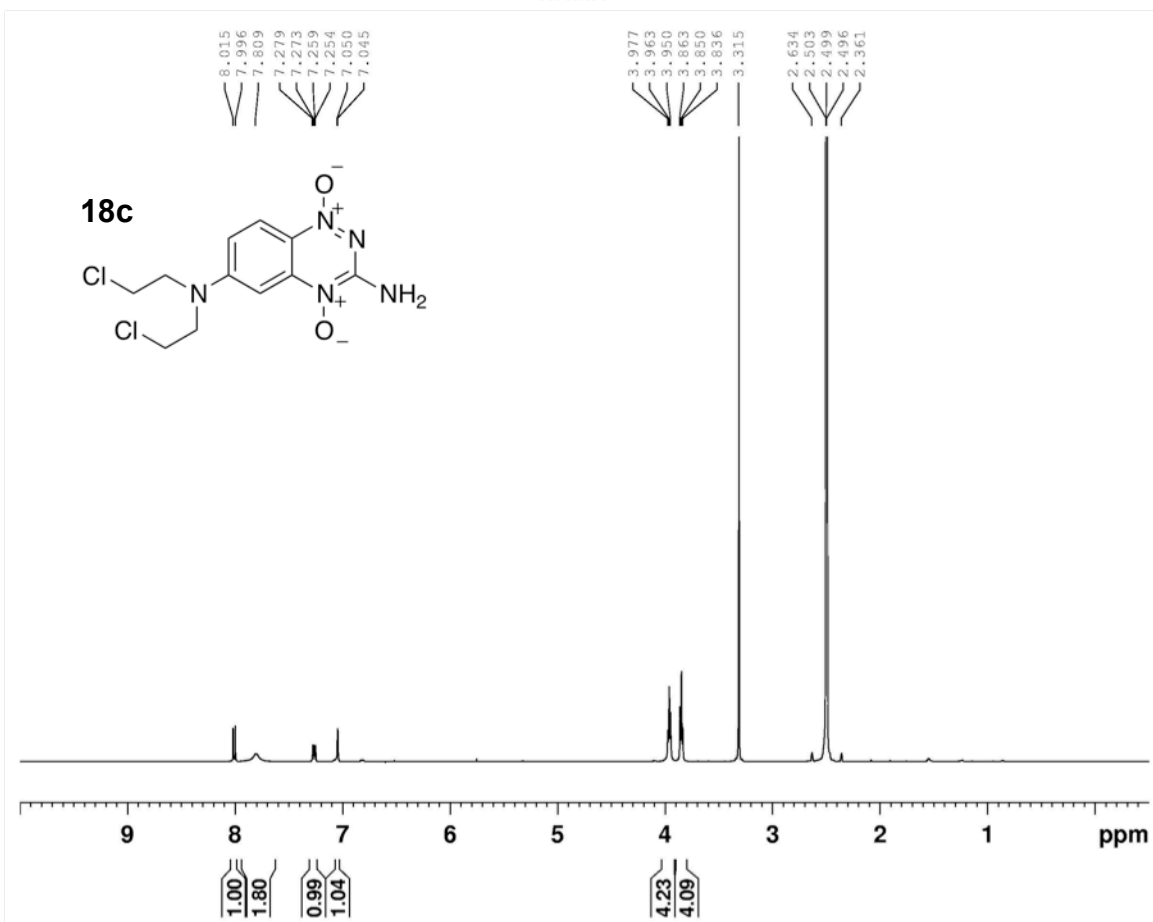



<sup>13</sup>CNMR

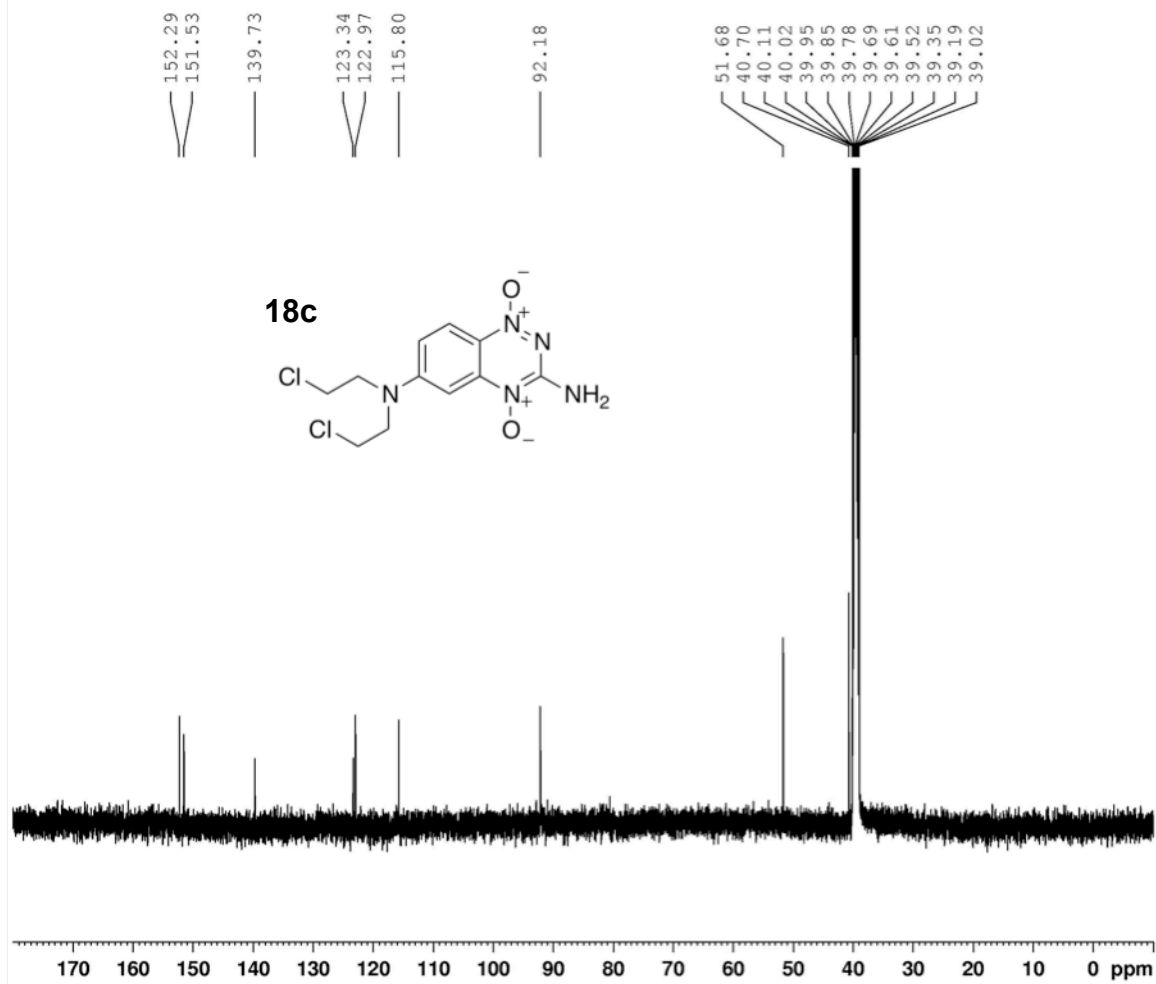

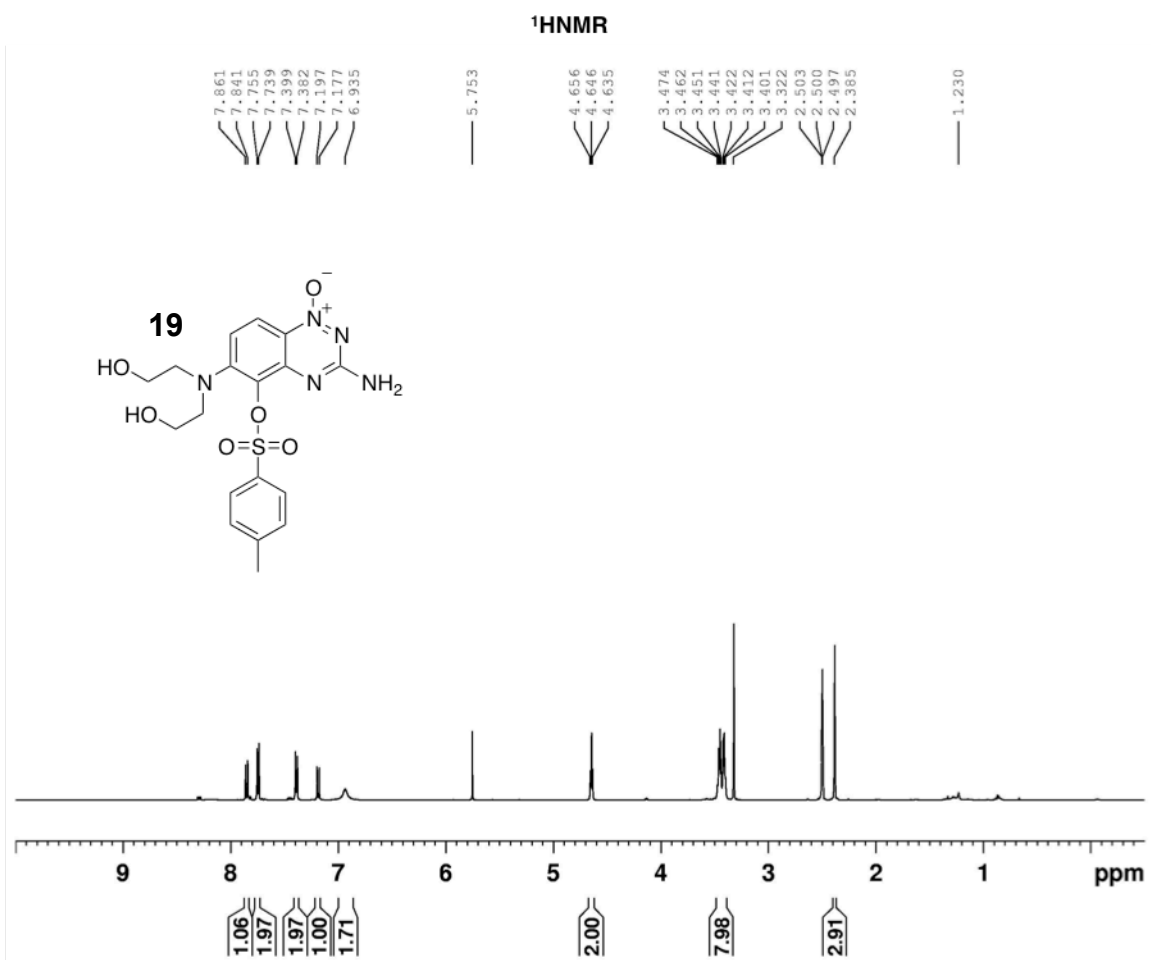

<sup>13</sup>CNMR

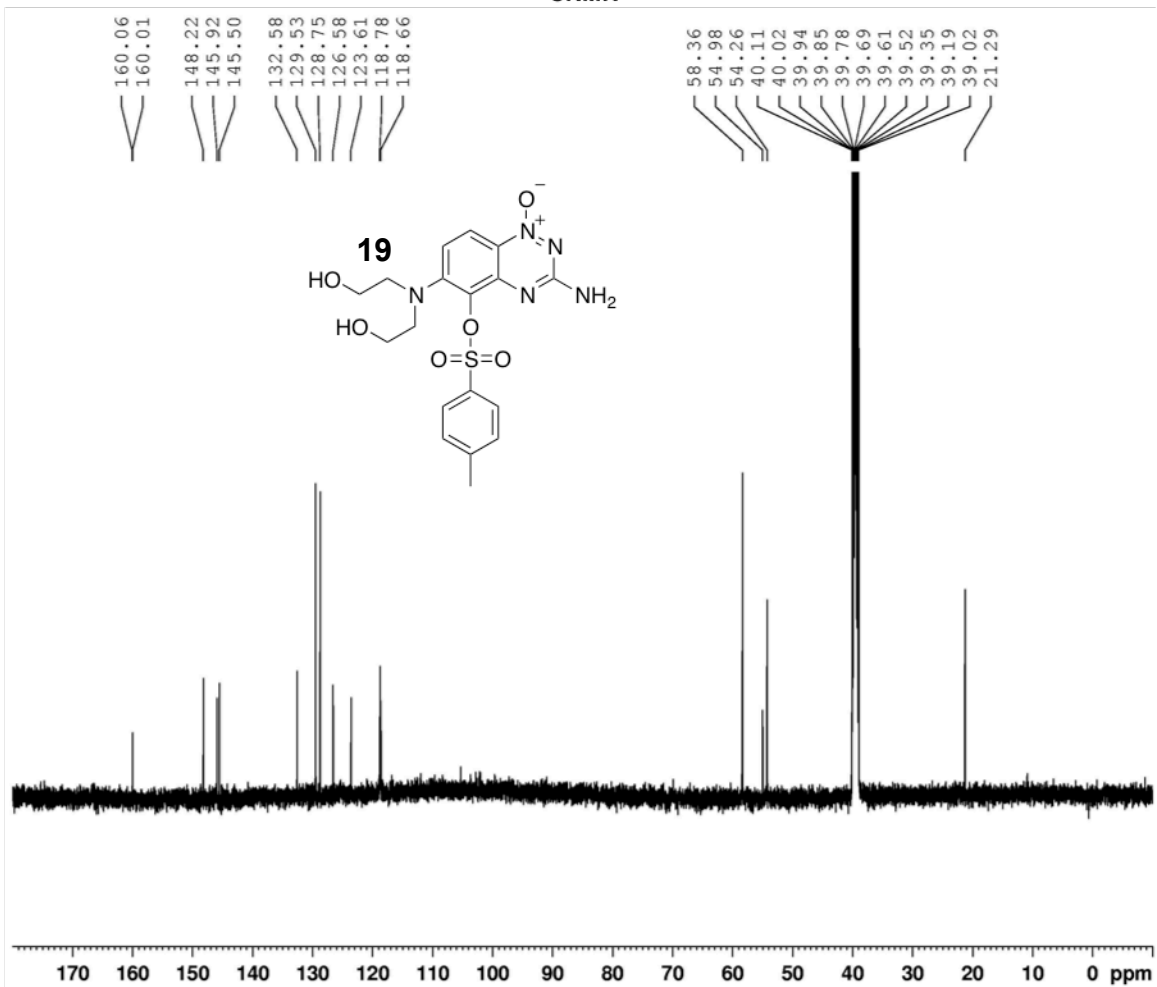

<sup>1</sup>H NMR

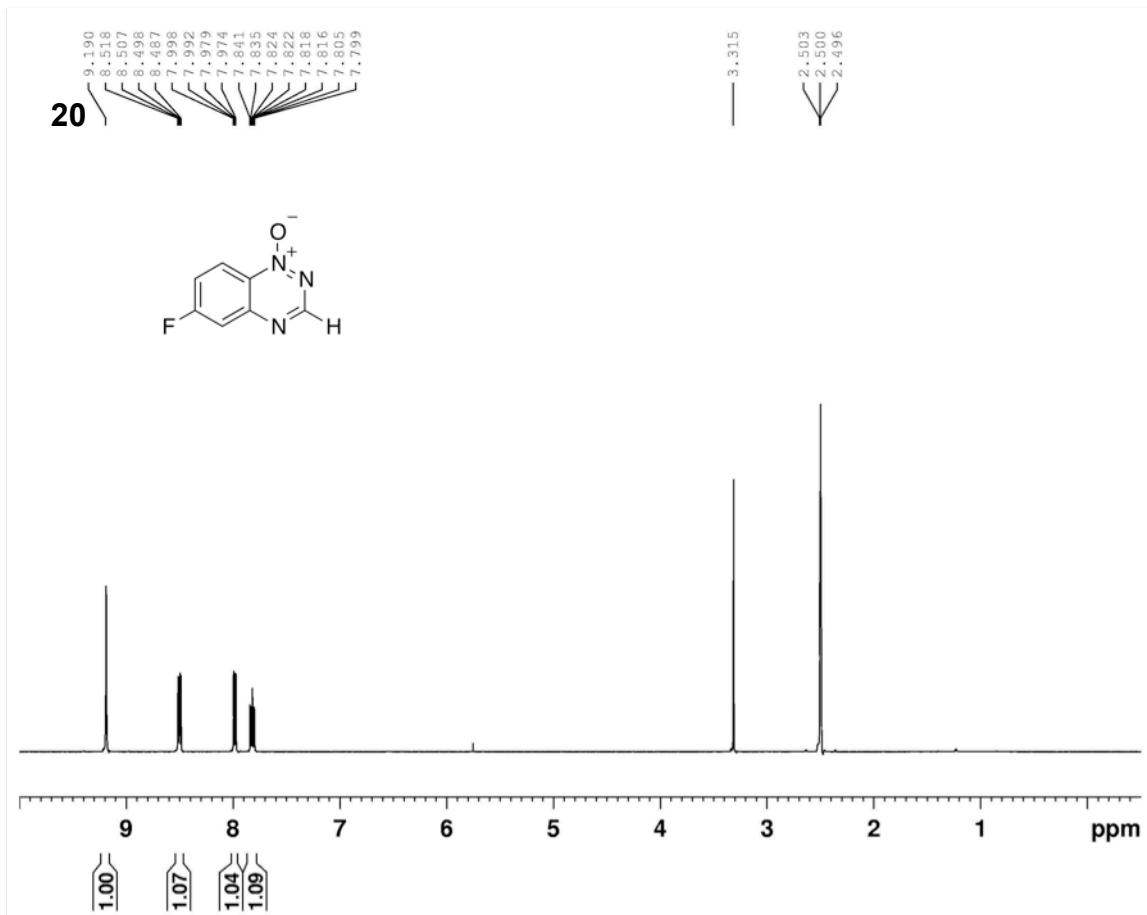

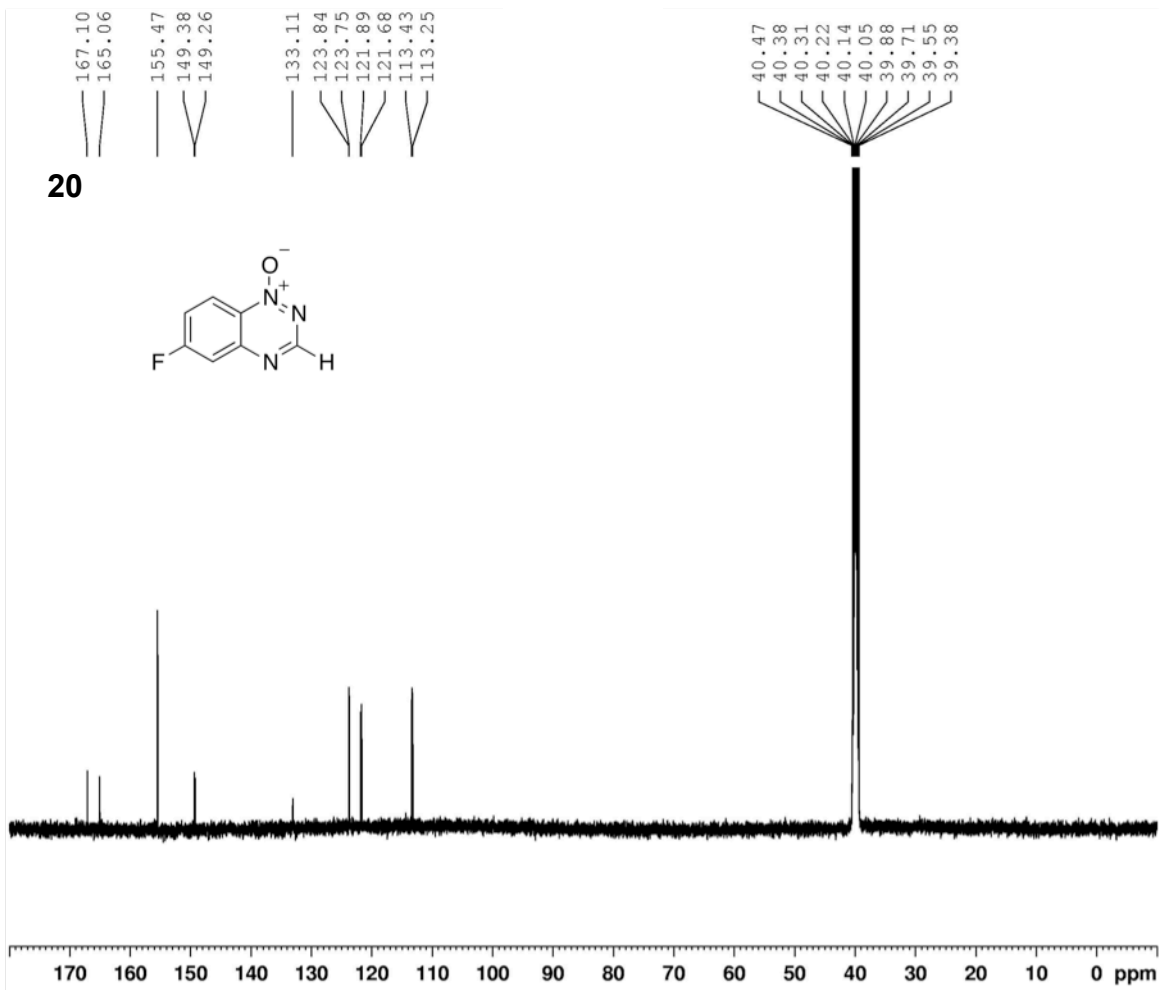

<sup>1</sup>HNMR

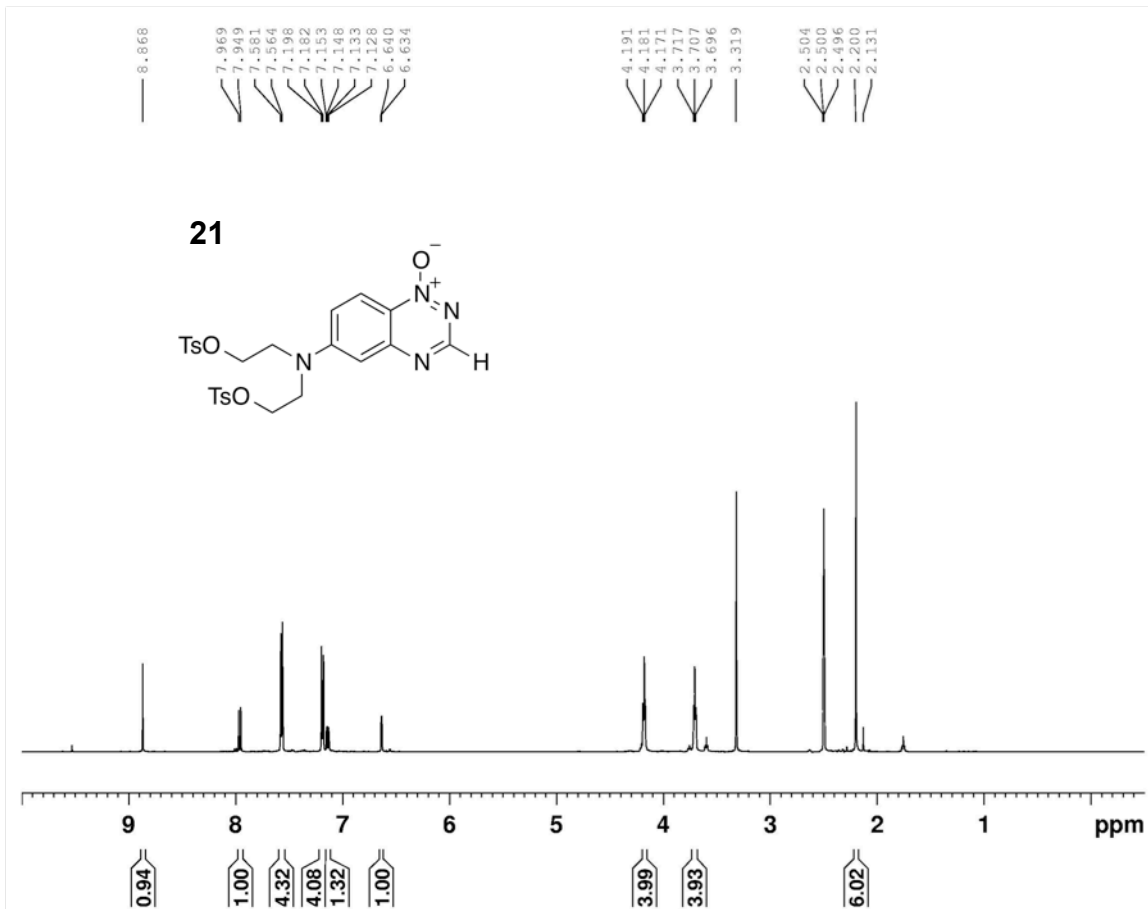

<sup>13</sup>CNMR

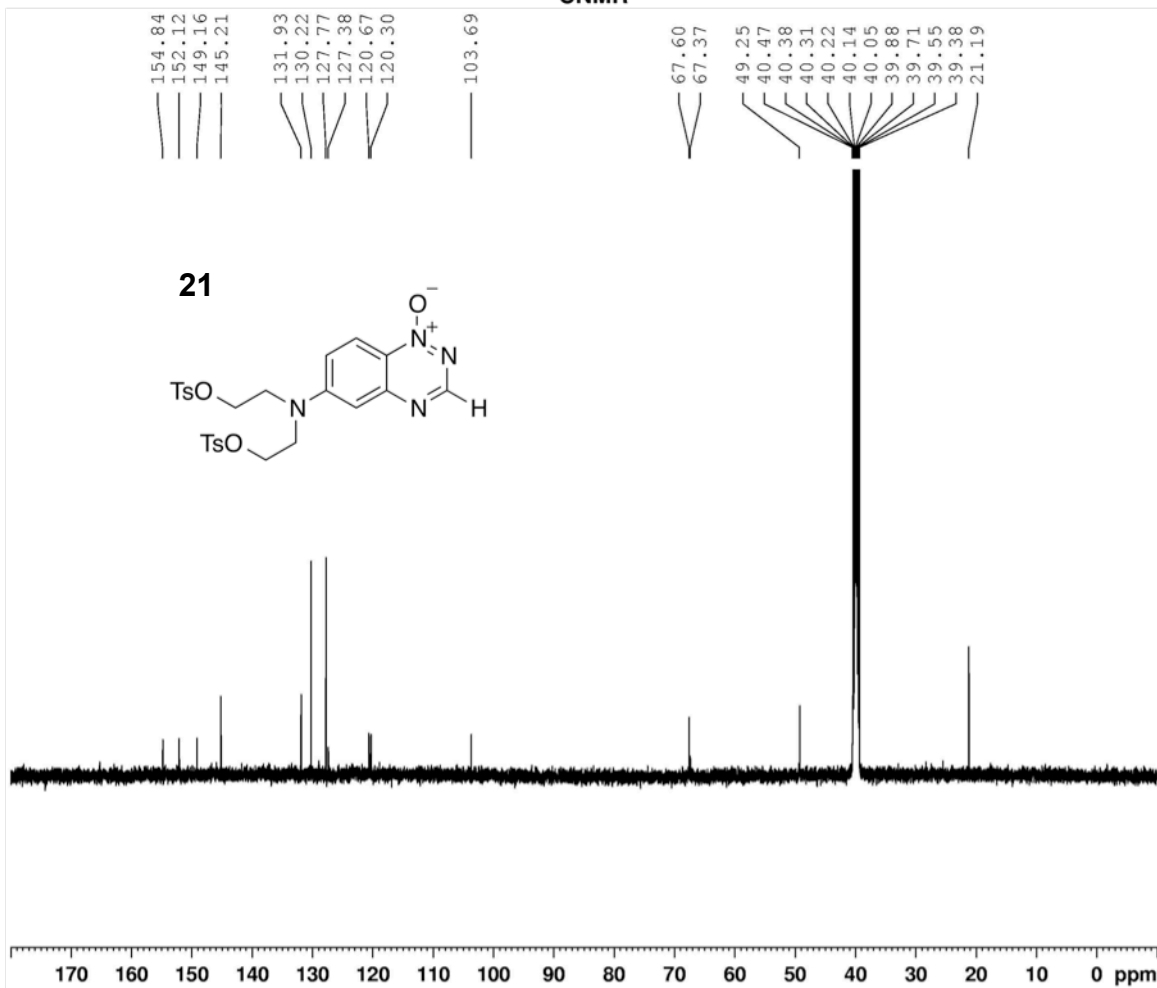

<sup>1</sup>H NMR

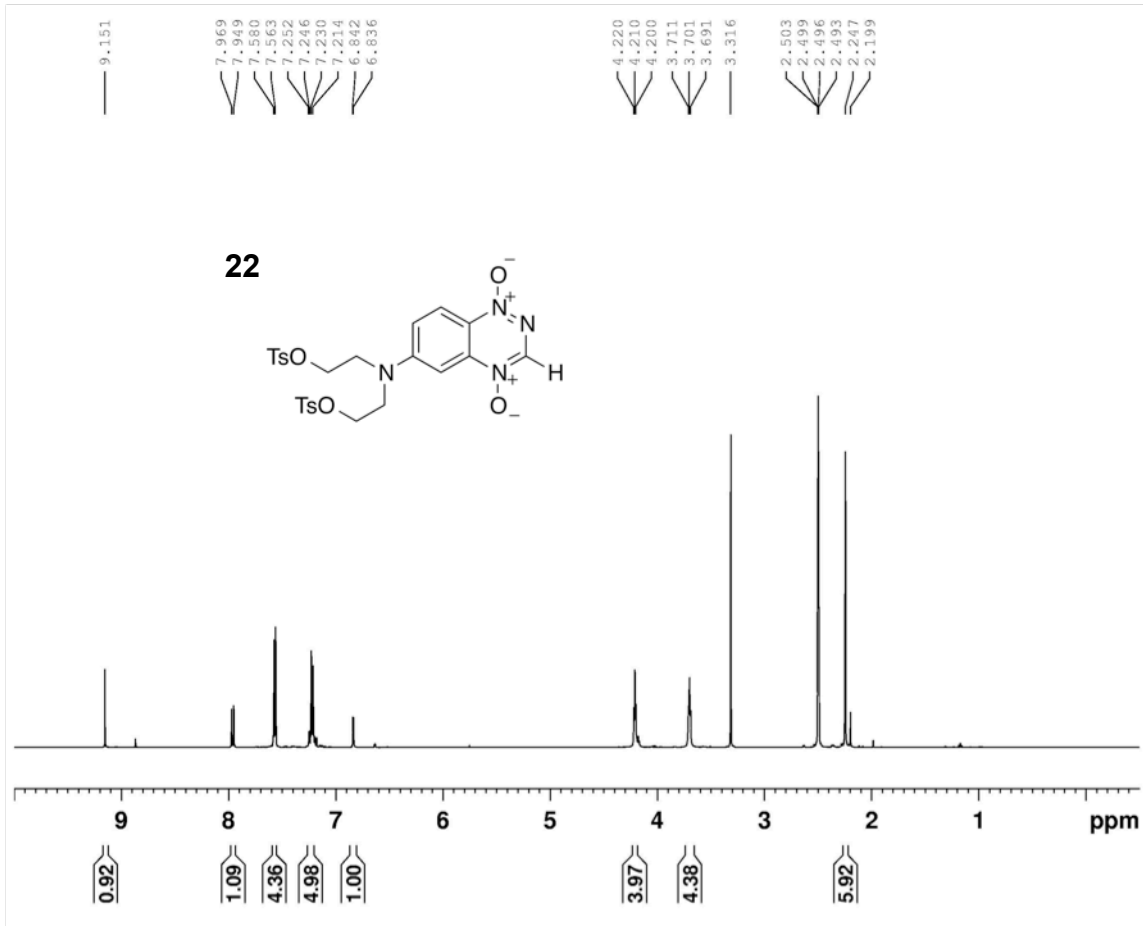



<sup>13</sup>CNMR

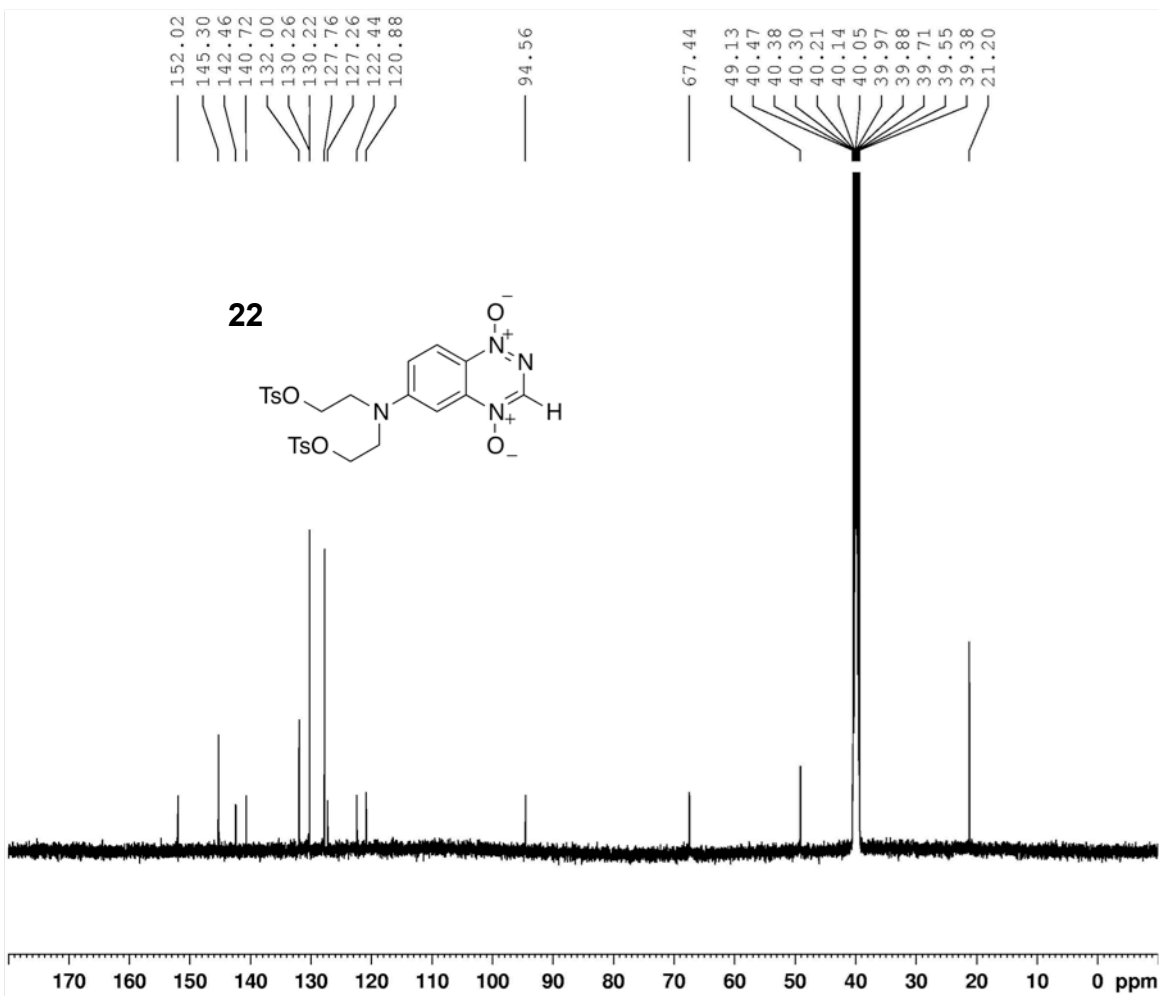

<sup>1</sup>H NMR

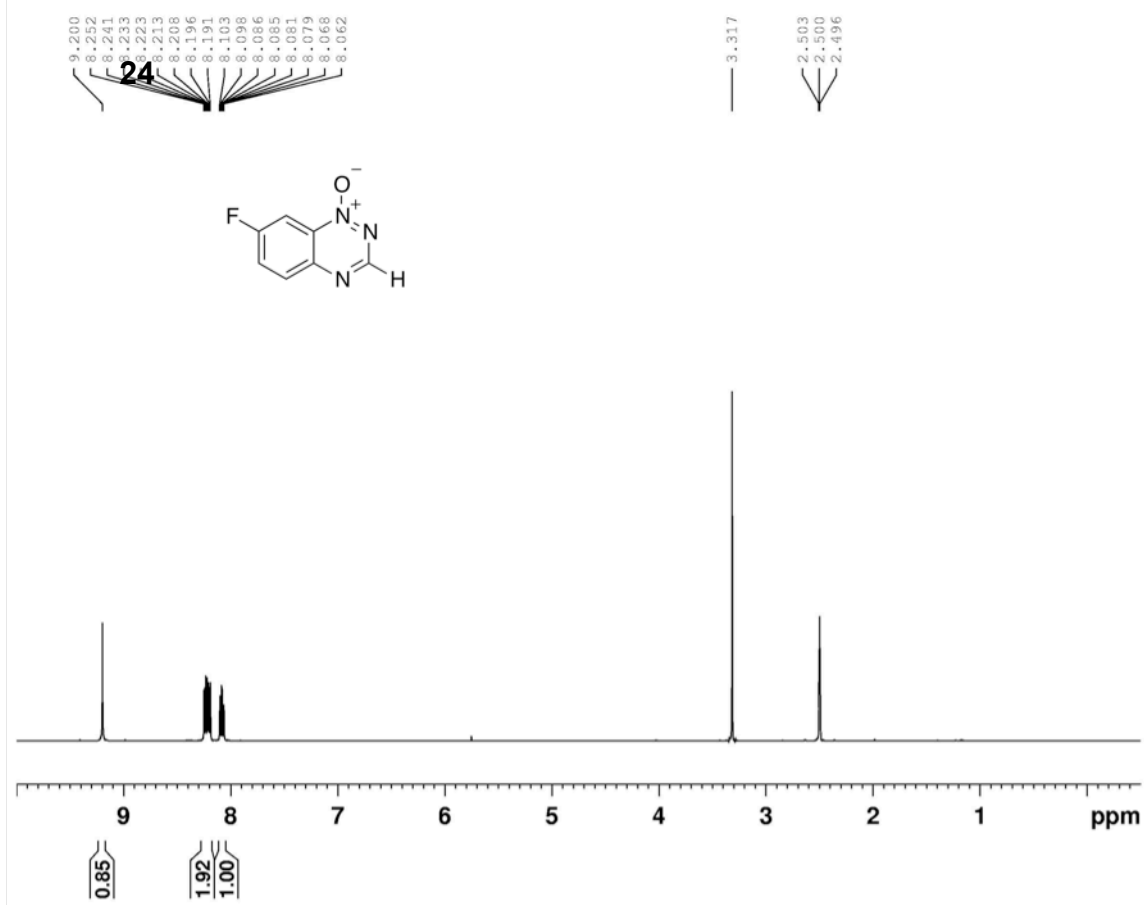

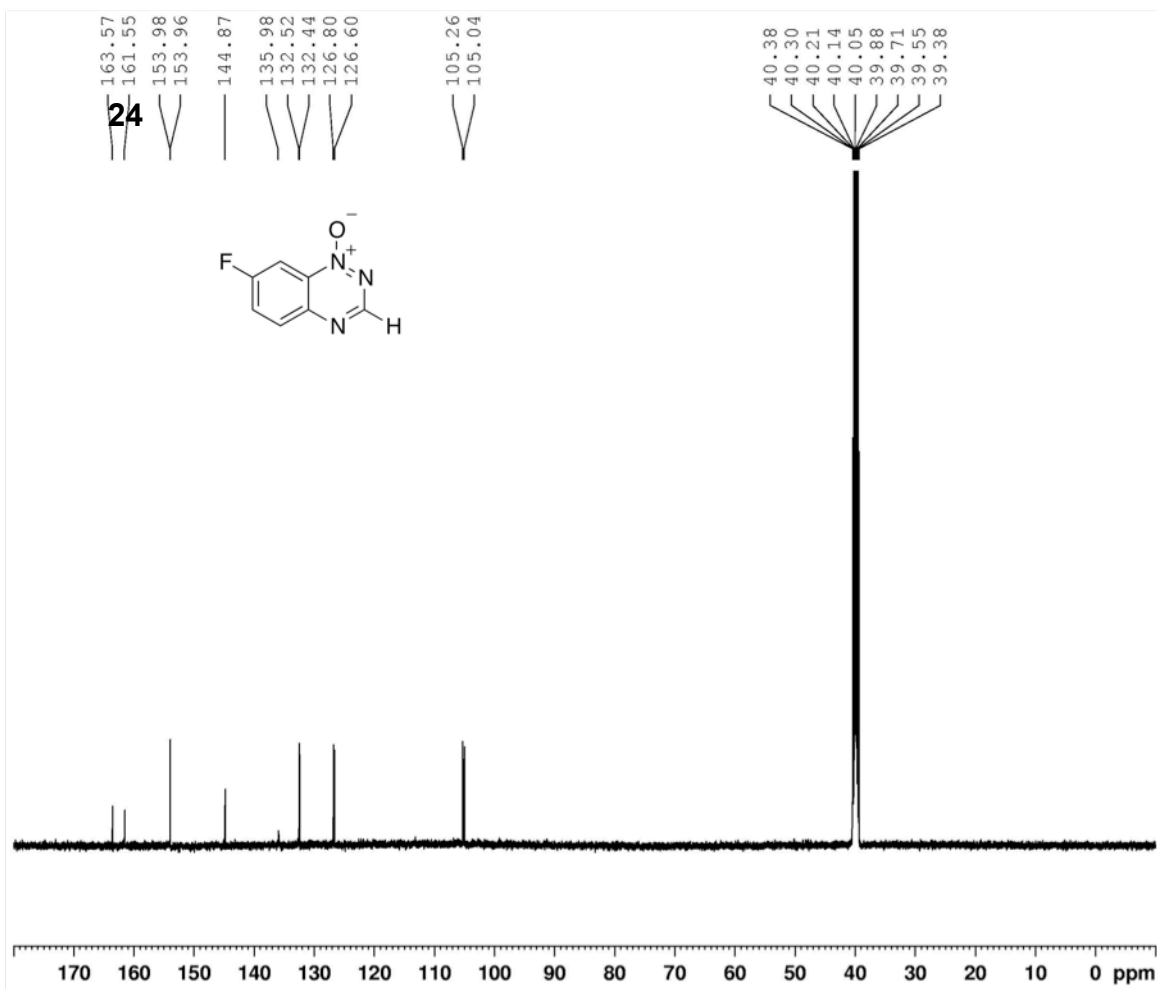

<sup>1</sup>HNMR

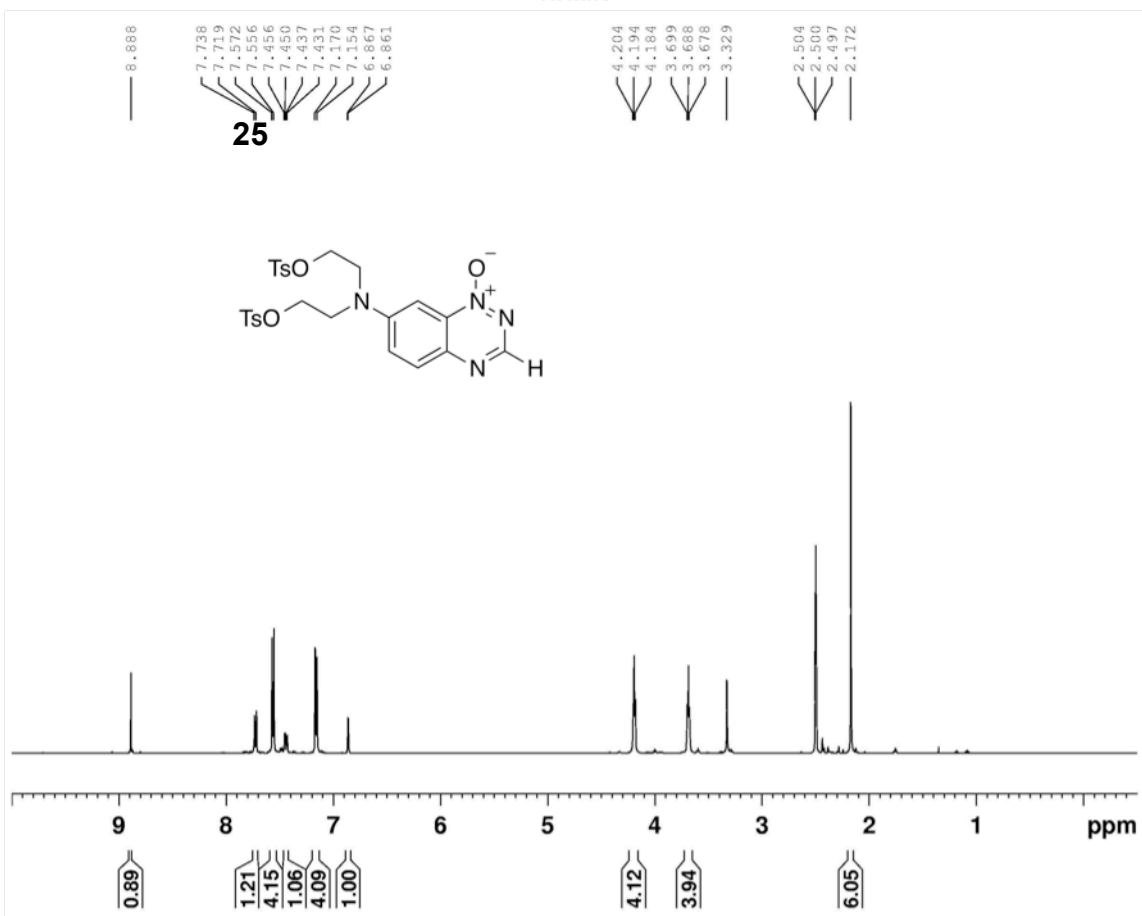

<sup>13</sup>CNMR

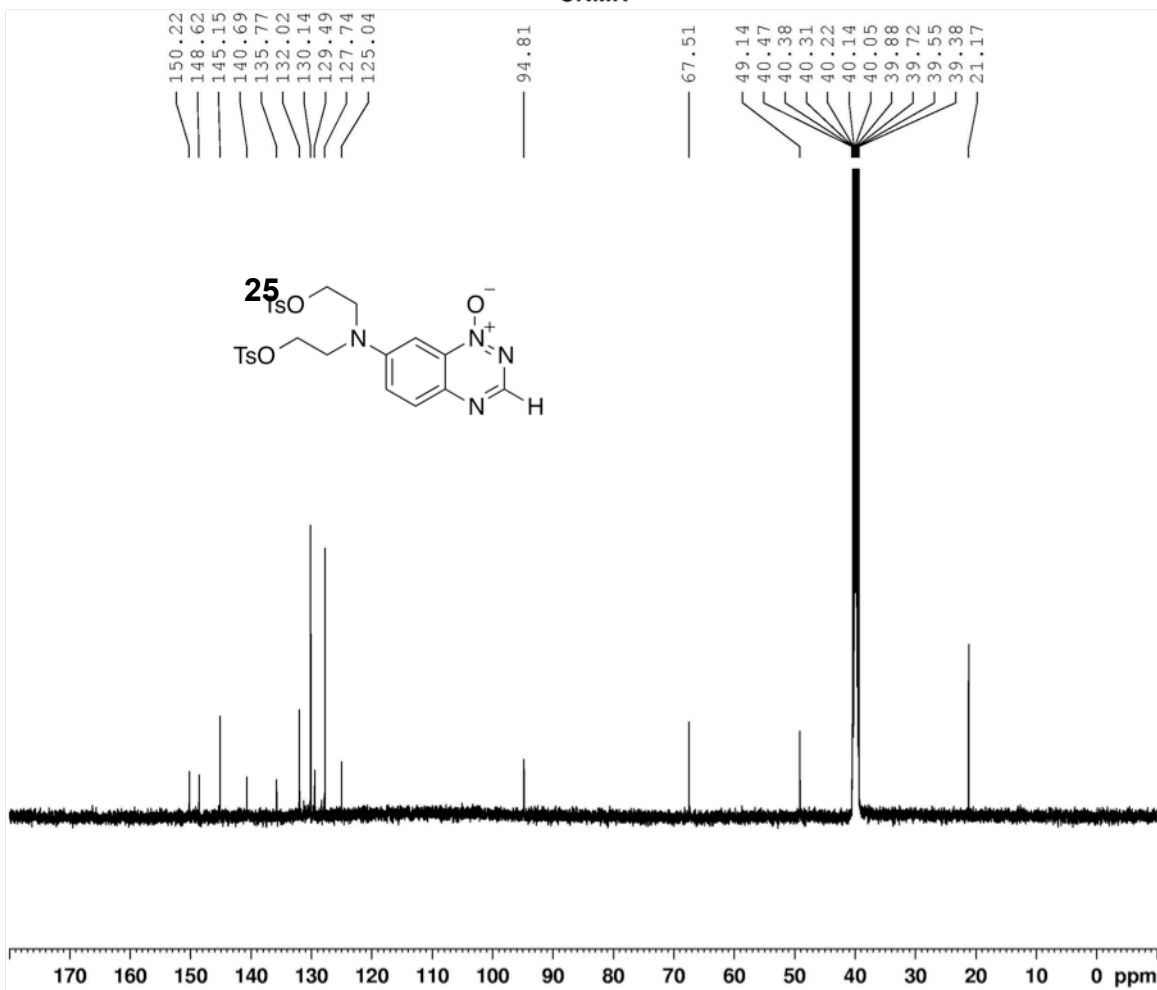

<sup>1</sup>H NMR

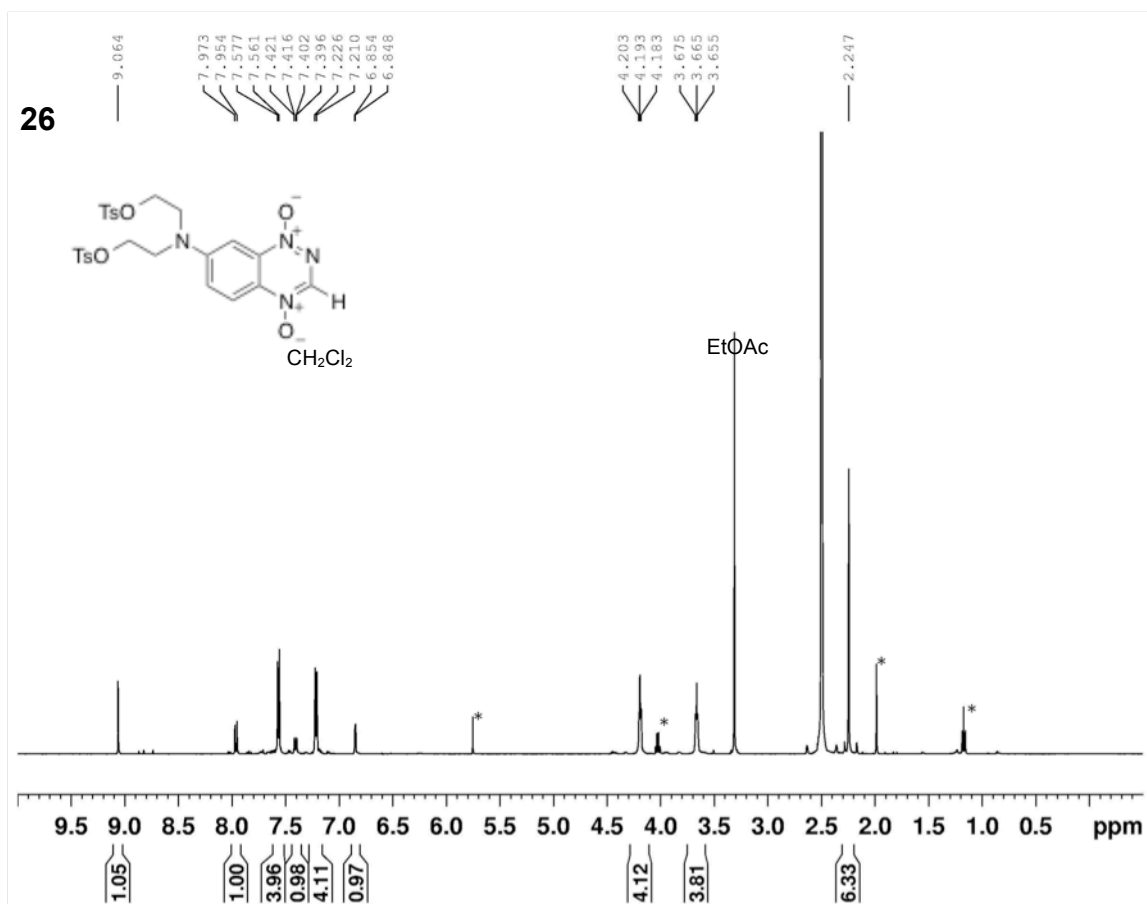

<sup>13</sup>CNMR

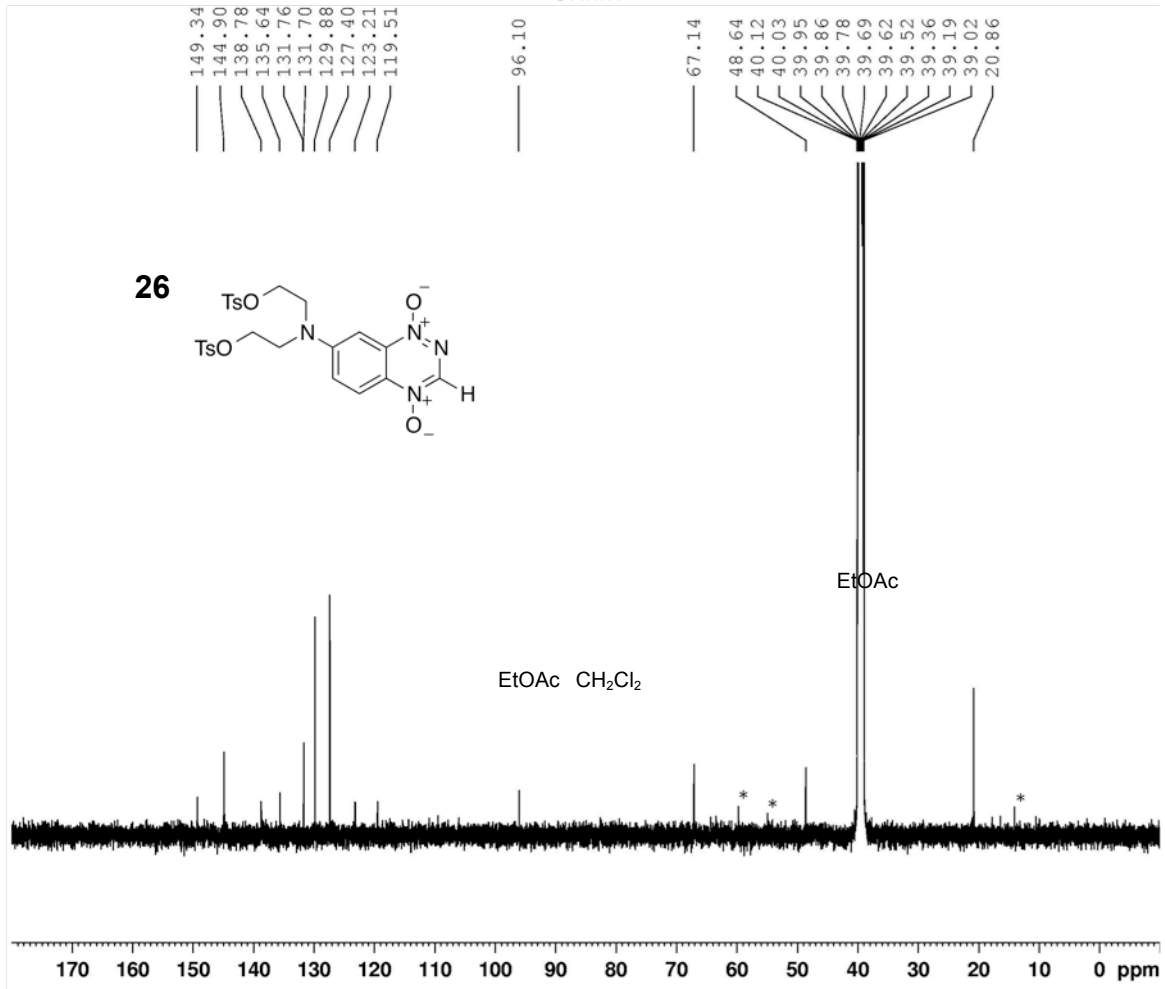

<sup>1</sup>H NMR

27

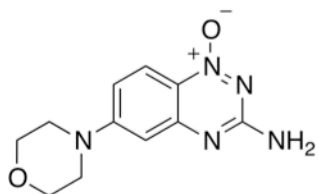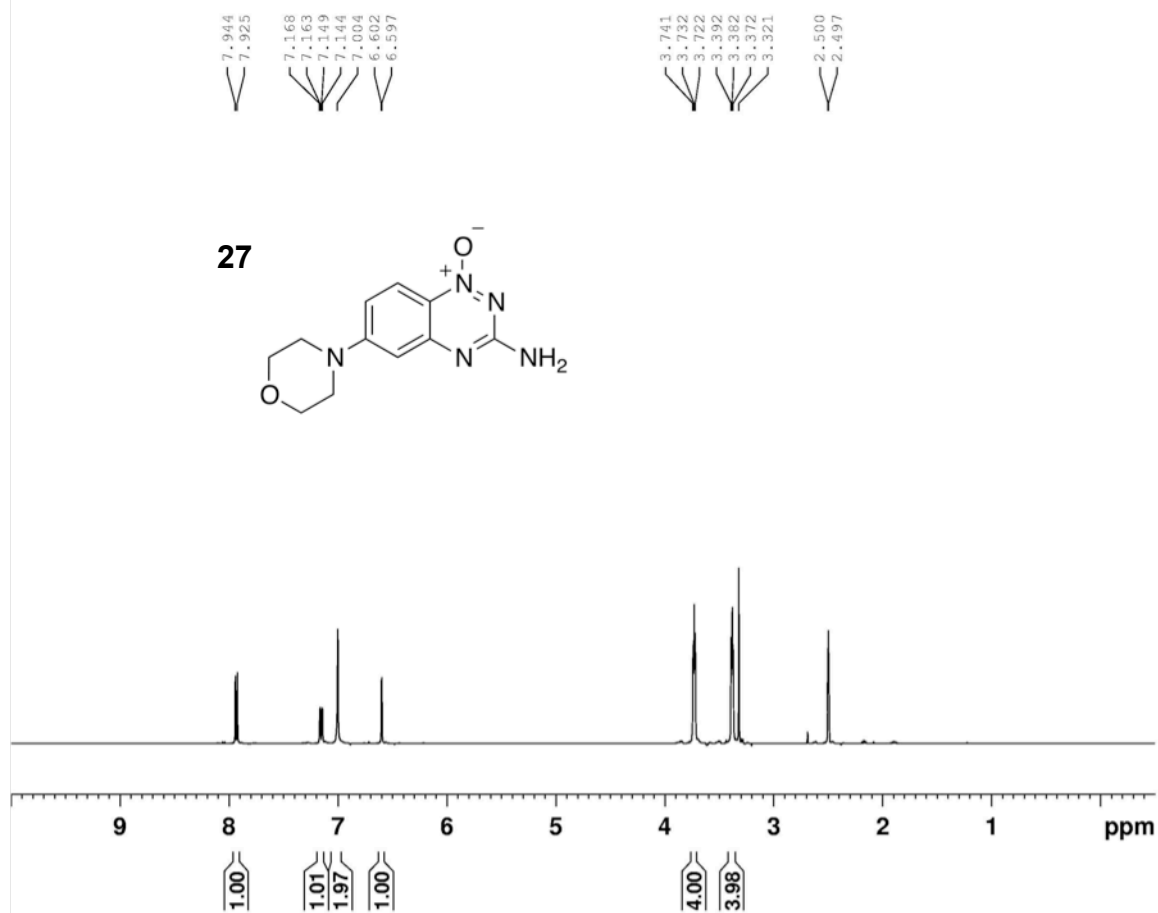



<sup>13</sup>CNMR

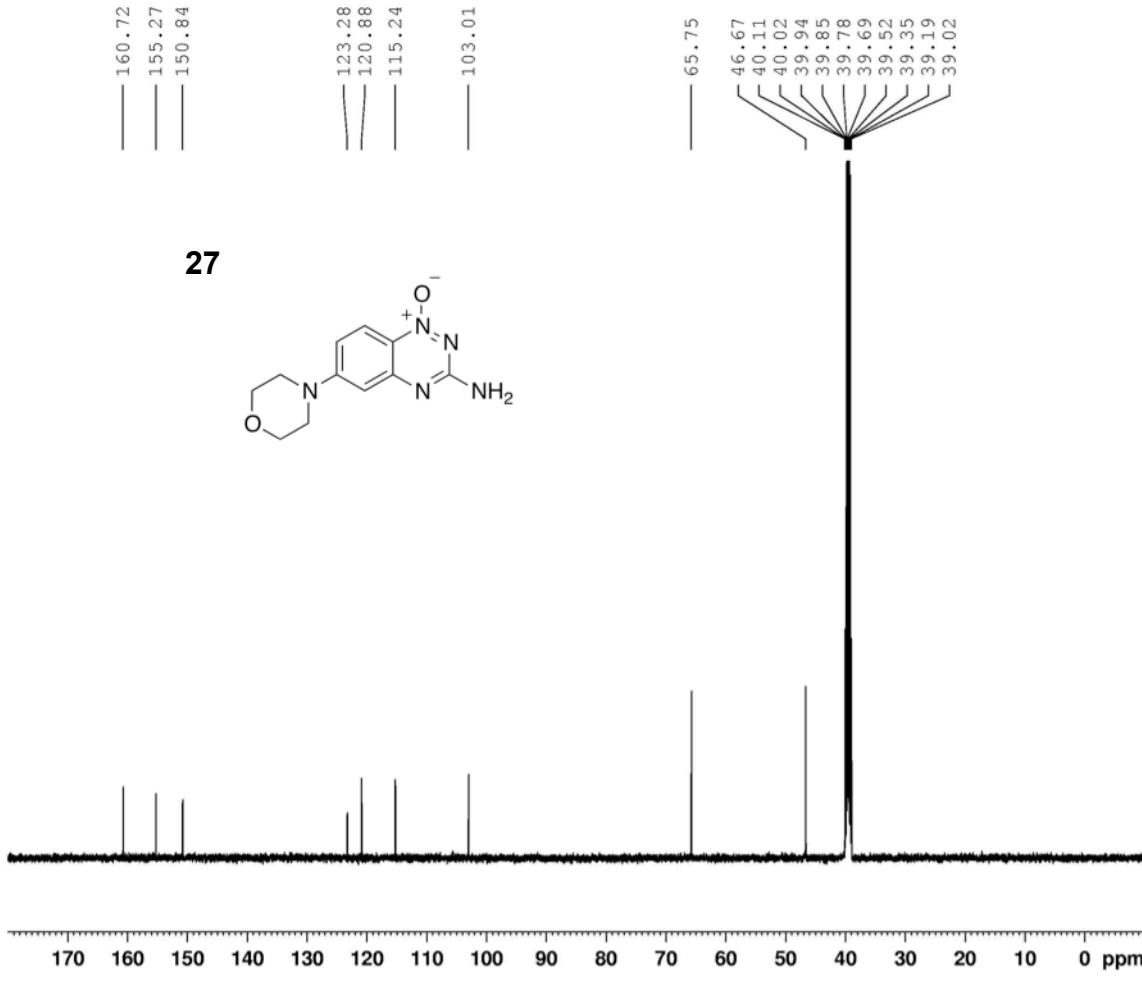

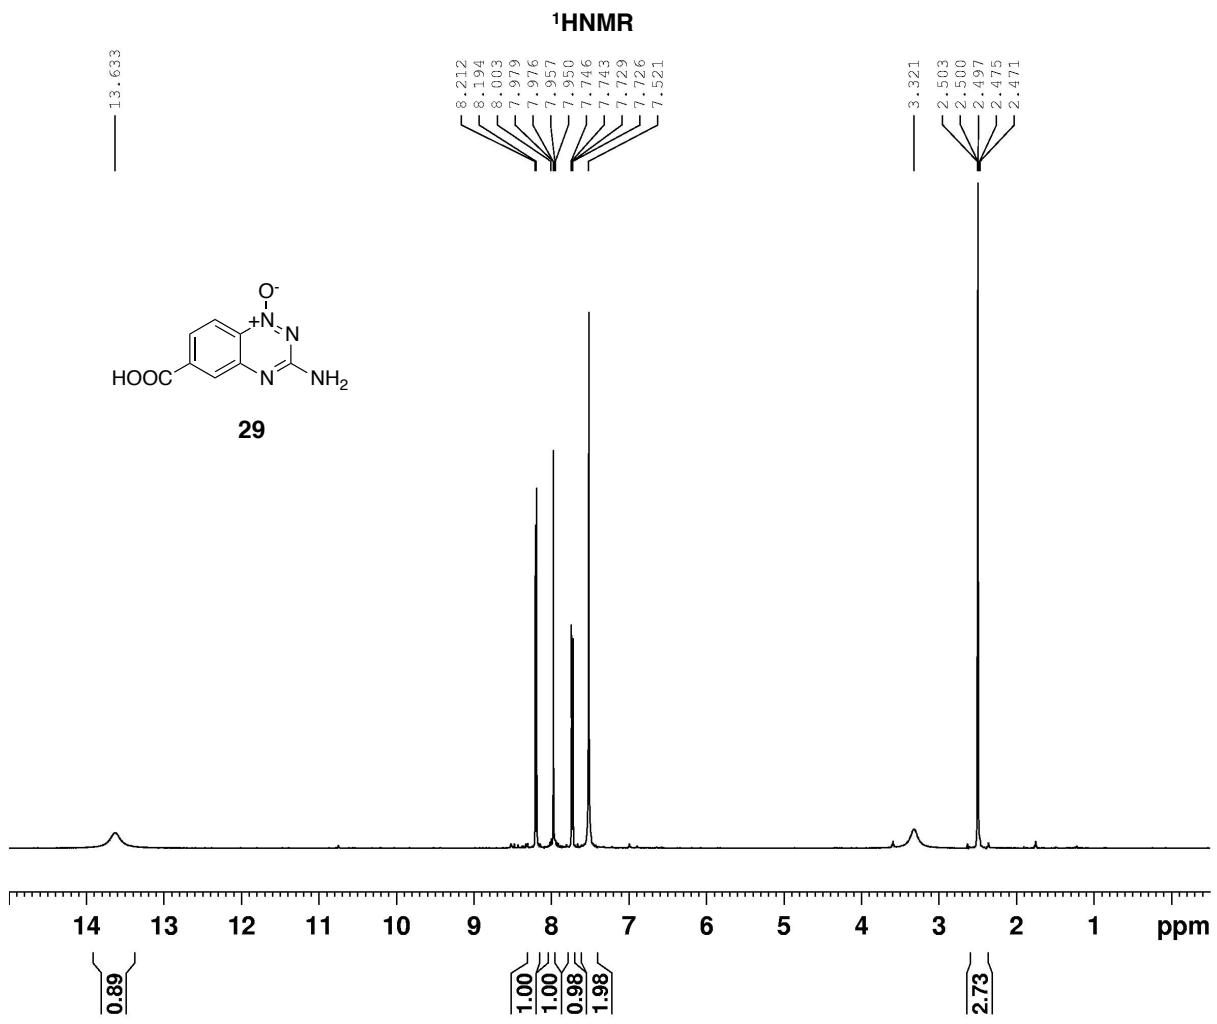

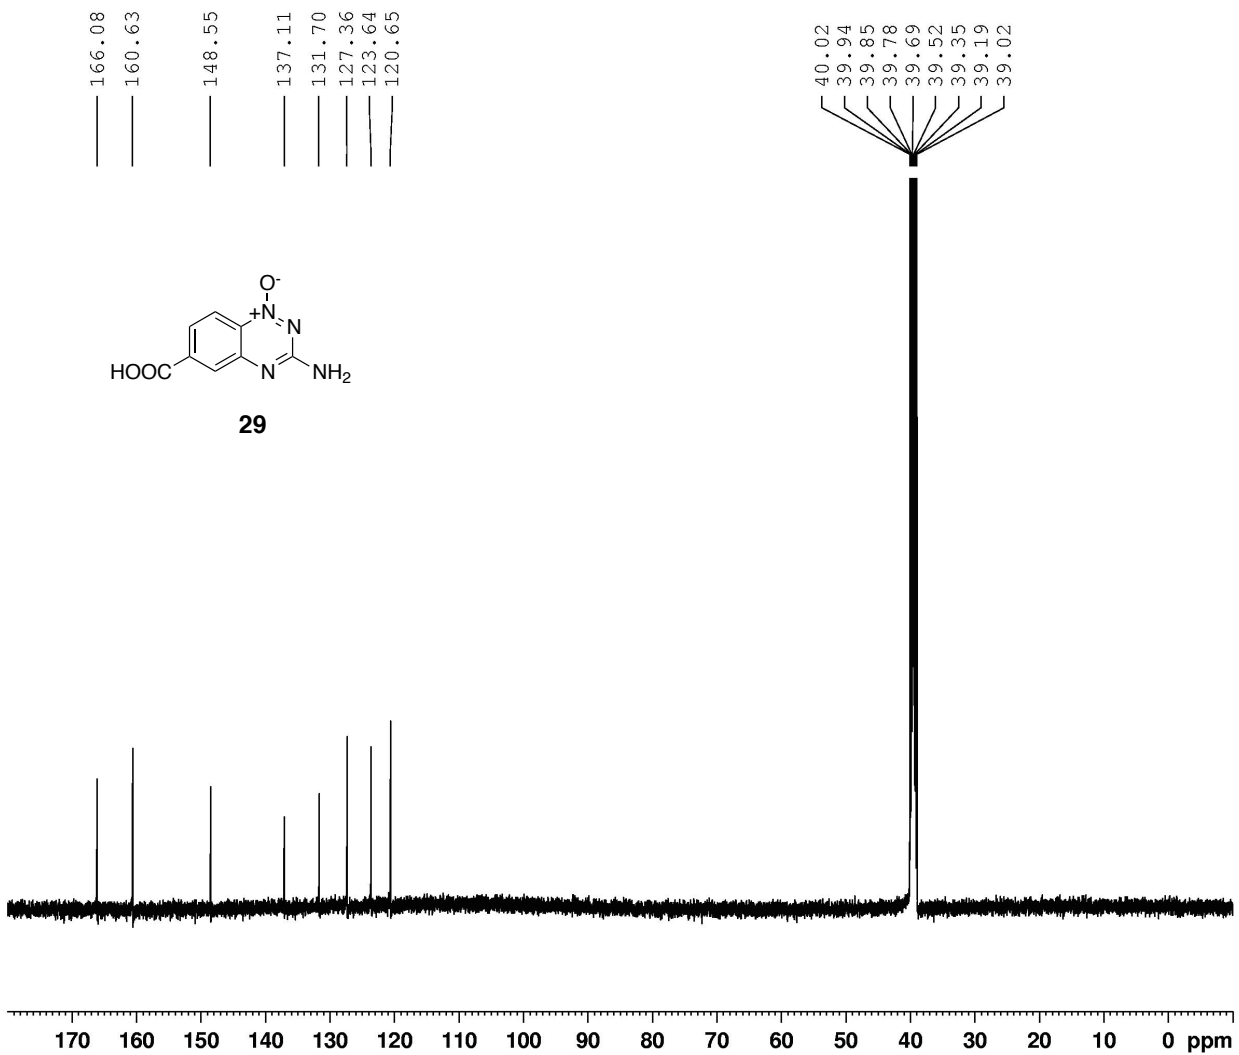

**<sup>1</sup>H NMR**

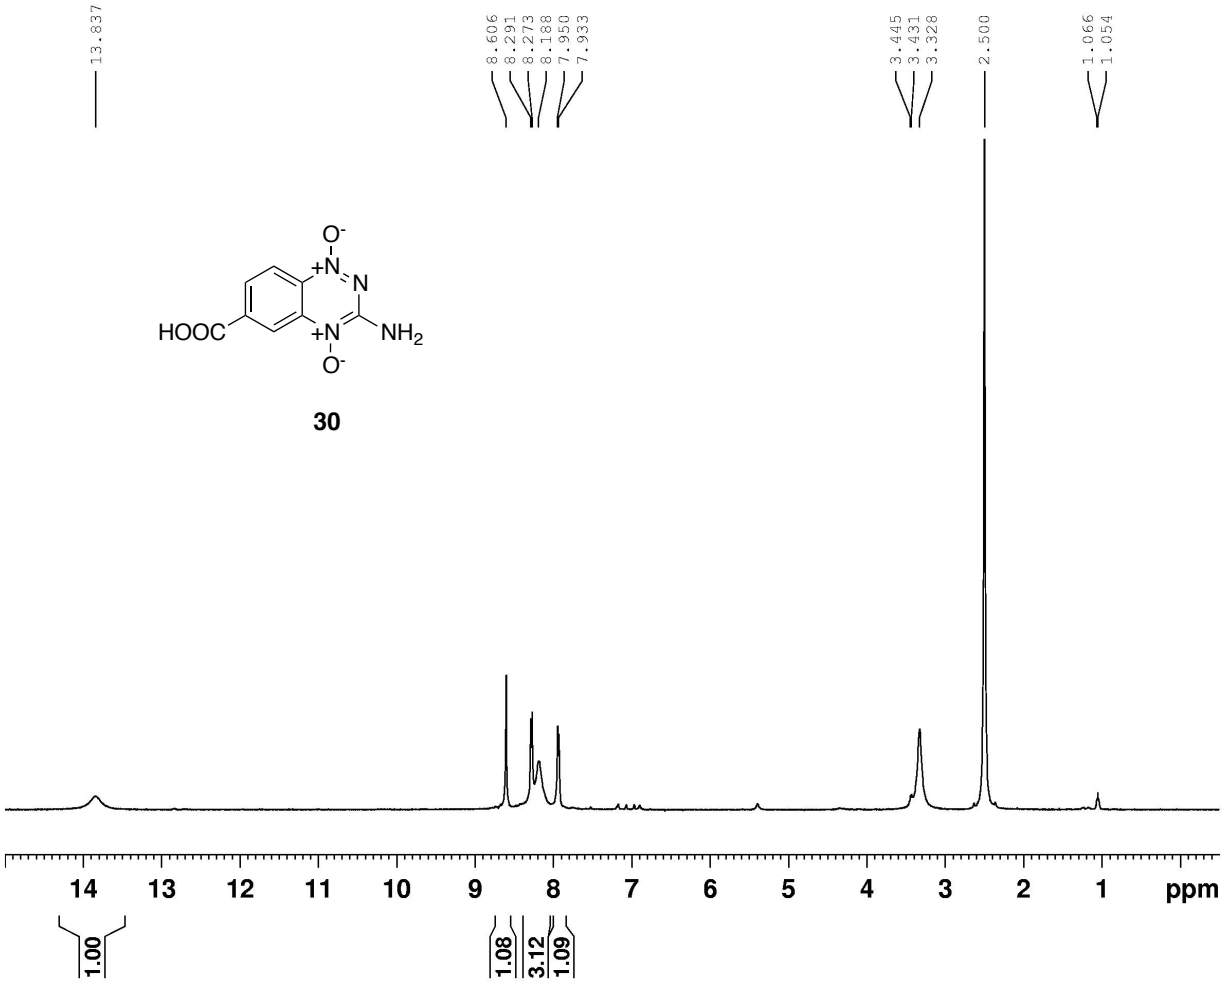

<sup>13</sup>CNMR

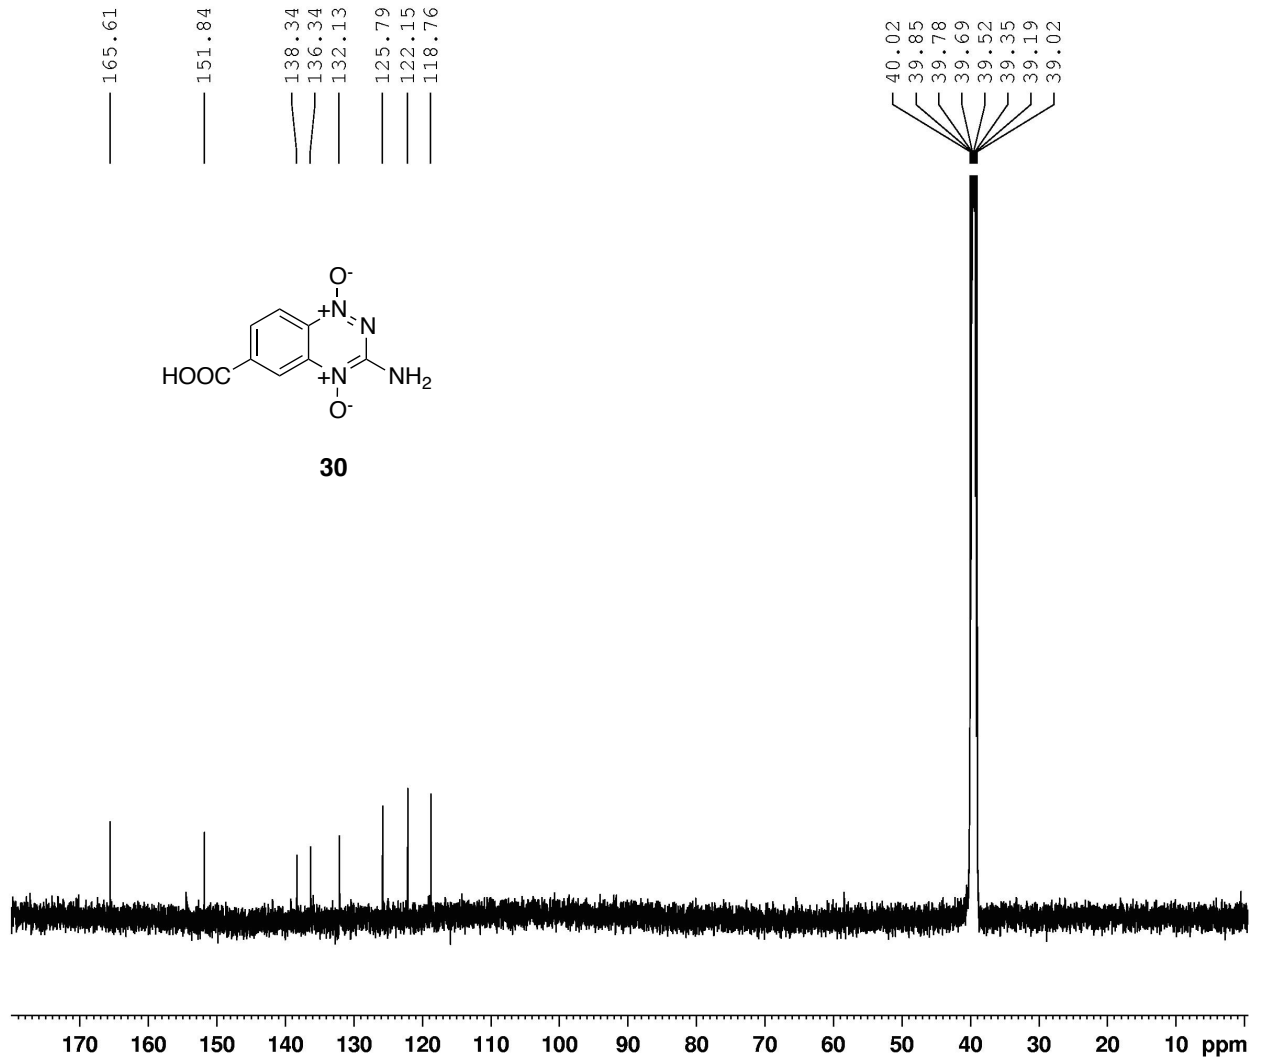

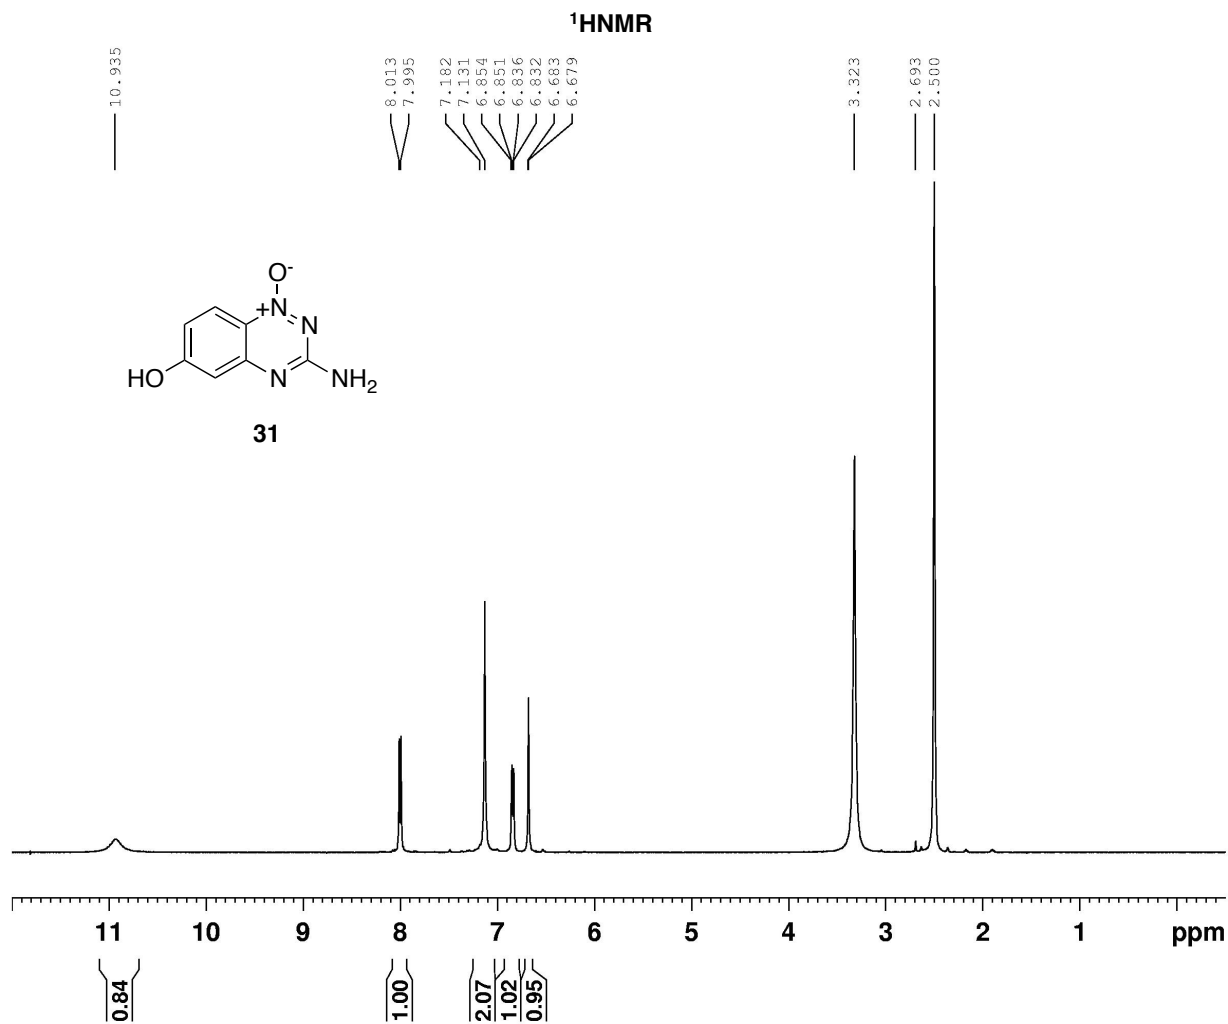

<sup>13</sup>CNMR

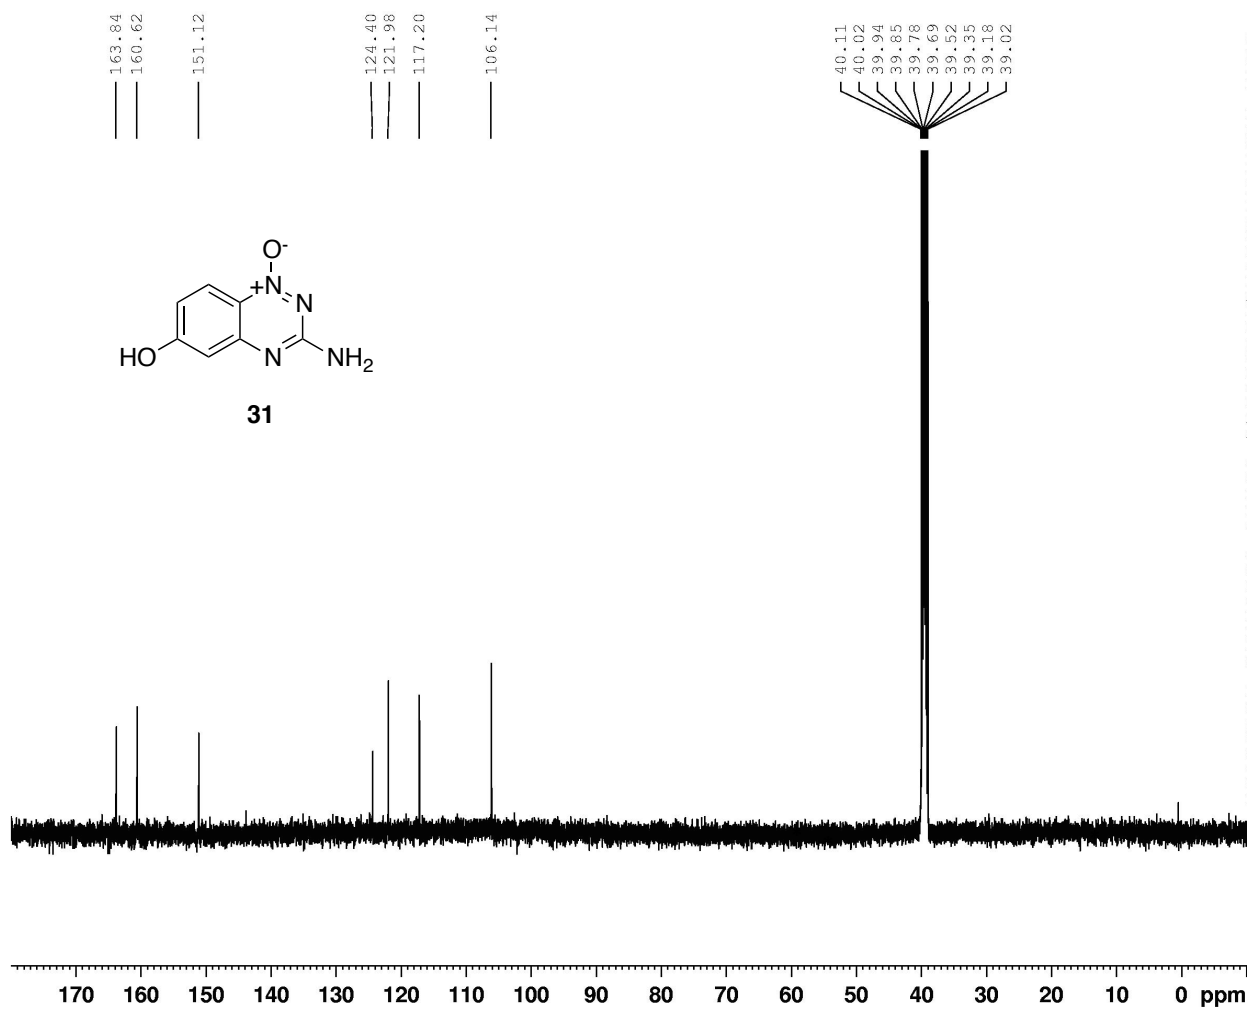

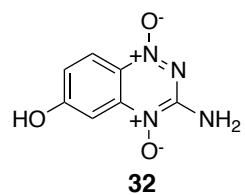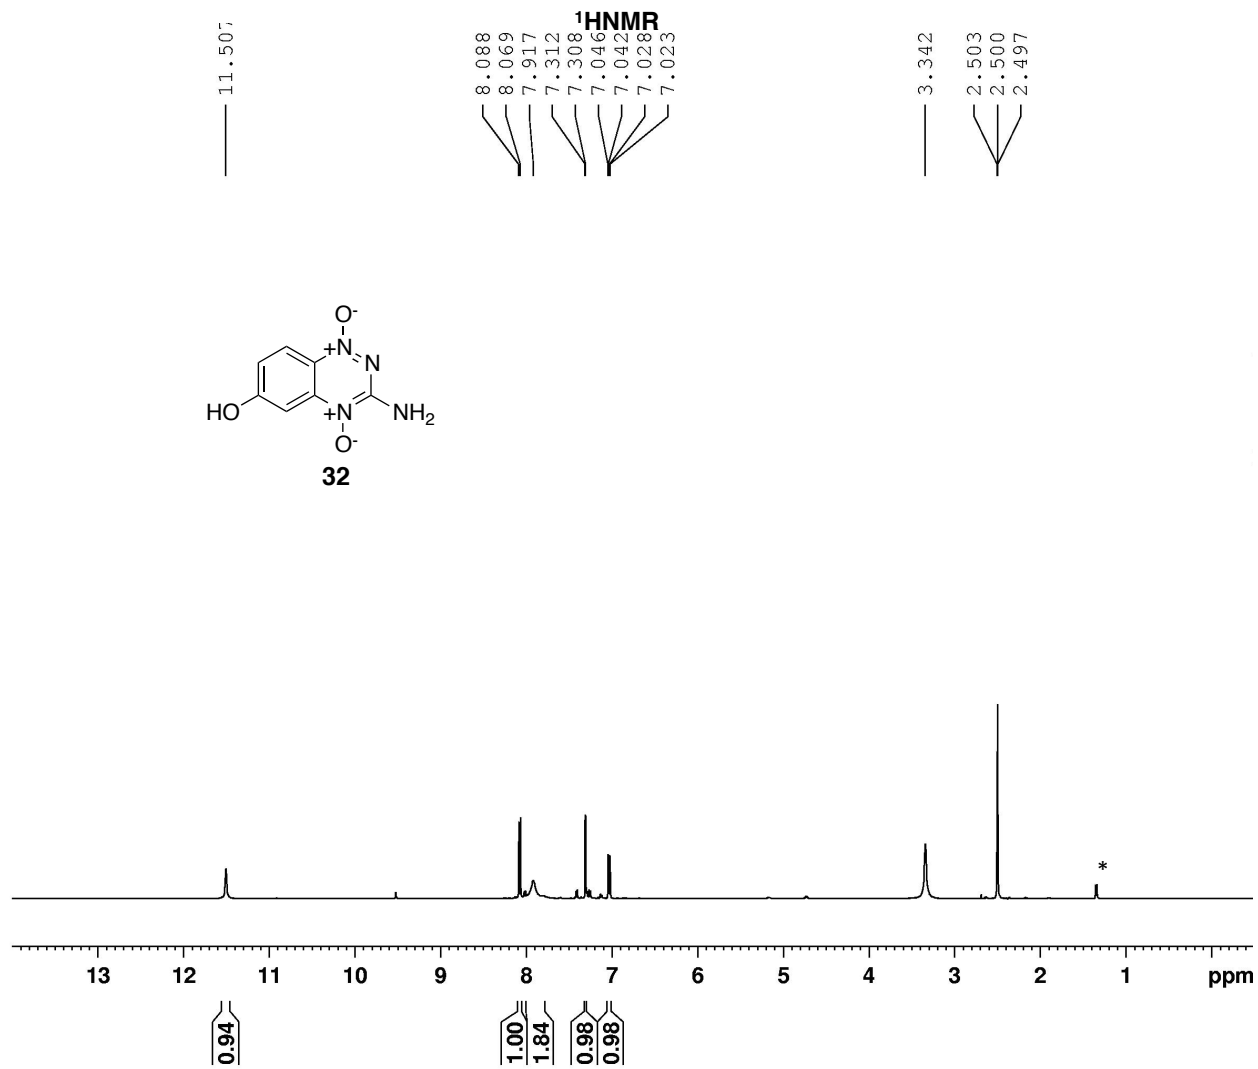



<sup>13</sup>CNMR

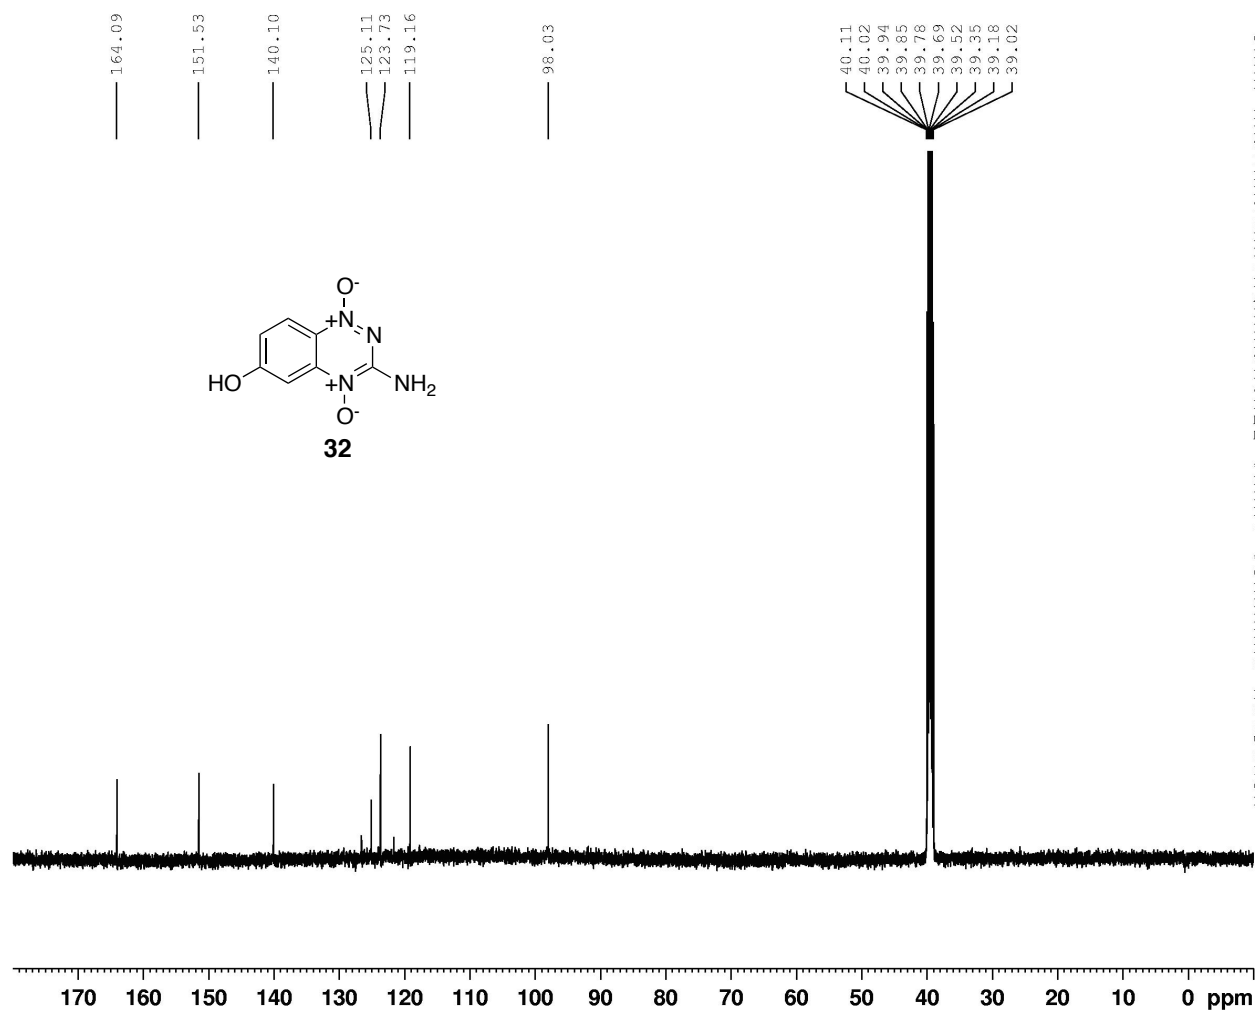

## References

1. Hay, M. P.; Gamage, S. A.; Kovacs, M. S.; Pruijn, F. B.; Anderson, R. F.; Patterson, A. V.; Wilson, W. R.; Brown, J. M.; Denny, W. A. *J. Med. Chem.* **2002**, *46*, 169-182.
2. Boyd, M.; Hay, M. P.; Boyd, P. D. W., *Magn. Res. Chem.* **2006**, *44*, 948-954.
3. Pchalek, K.; Hay, M. P. *J. Org. Chem.* **2006**, *71*, 6530-6535.
4. Ligthart, G. B. W. L.; Guo, D.; Spek, A. L.; Kooijman, H.; Zuilhof, H.; Sijbesma, R. P., *J. Org. Chem.* **2007**, *73*, 111-117.
5. Cantrell Jr, W. R.; Bauta, W. E.; Engles, T., *Tetrahedron Lett.* **2006**, *47*, 4249-4251.
